# Supplementary material for: Hetero-Type Benzannulation Leading to Substituted Benzothio-Phenes
Source: MDPI journal article supplement (doi:10.3390/molecules26227008), 2021-11-19
Supplement: s1 [file s1]

# Supporting Information

## Hetero-type Benzannulation Leading to Substituted Benzothiophenes

Taro Kono, Ryosuke Sasaki, Hideki Goto, Masatoshi Kakuno, and Yoo Tanabe\*

*Department of Chemistry, School of Science and Technology, Kwansei Gakuin University, 2-1  
Gakuen, Sanda, Hyogo, 669-1337, Japan*

tanabe@kwansei.ac.jp

|                                                                                           |     |
|-------------------------------------------------------------------------------------------|-----|
| <b>Table of Contents</b>                                                                  | S1  |
| <sup>1</sup> H NMR, <sup>13</sup> C NMR spectra for compounds <b>3-23 (Figure S1-S44)</b> | S2  |
| Electronic Supporting Information of Free Energy Calculation                              | S24 |

### Corresponding Author:

Professor Yoo Tanabe

Department of Chemistry, School of Science and Technology, Kwansei Gakuin University,  
2-1 Gakuen, Sanda, Hyogo, 669-1337, Japan

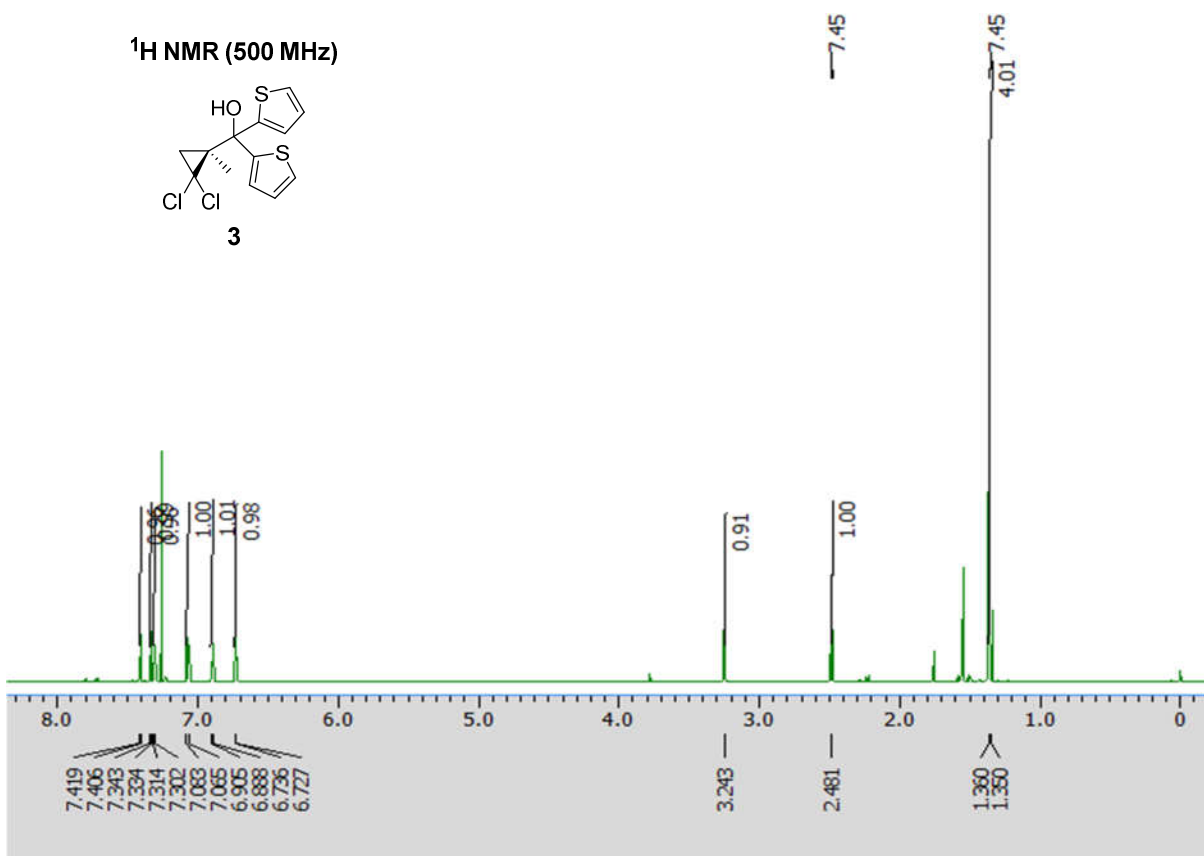

Figure S1:  $^1\text{H}$  NMR (500 MHz,  $\text{CDCl}_3$ ) Spectrum of the Compound 3

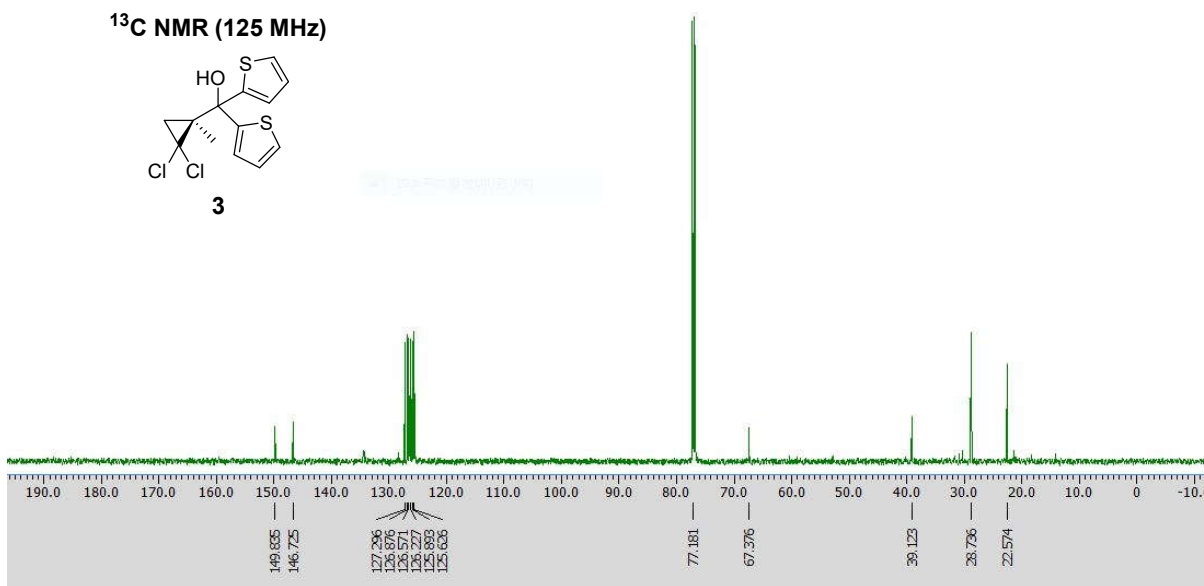

Figure S2:  $^{13}\text{C}$  NMR (125 MHz,  $\text{CDCl}_3$ ) Spectrum of the Compound 3

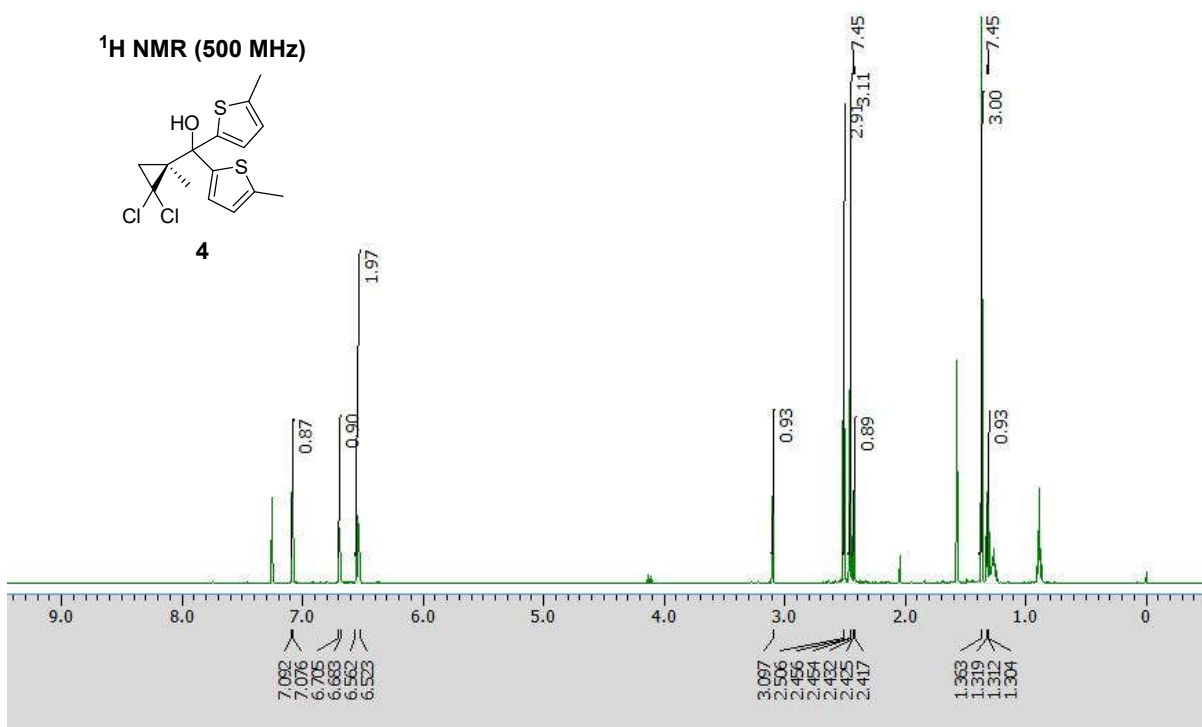

Figure S3: <sup>1</sup>H NMR (500 MHz, CDCl<sub>3</sub>) Spectrum of the Compound 4

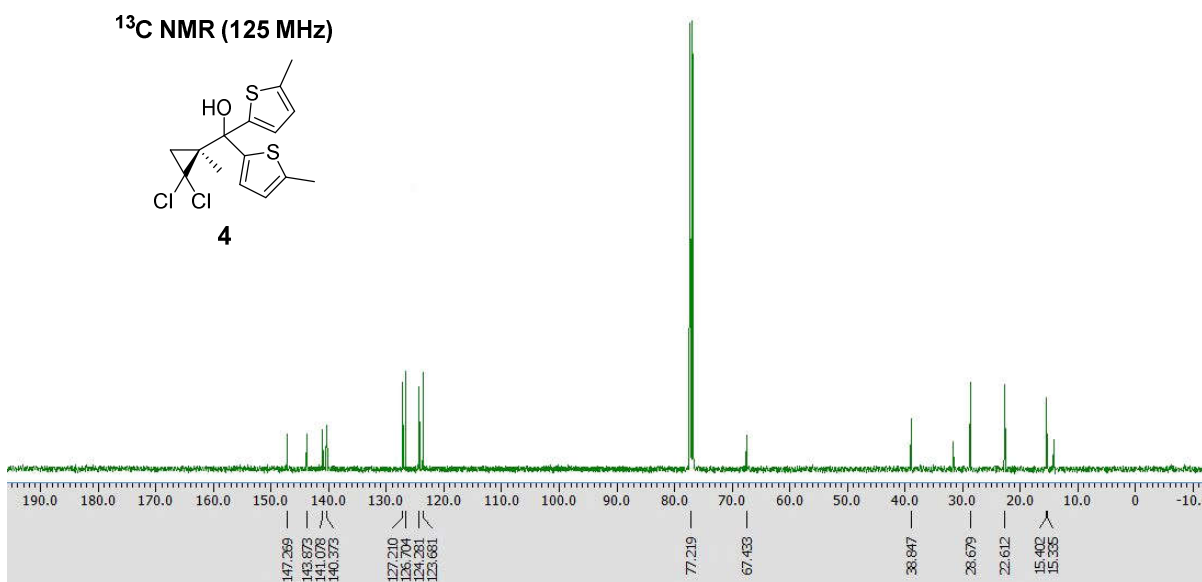

Figure S4: <sup>13</sup>C NMR (125 MHz, CDCl<sub>3</sub>) Spectrum of the Compound 4

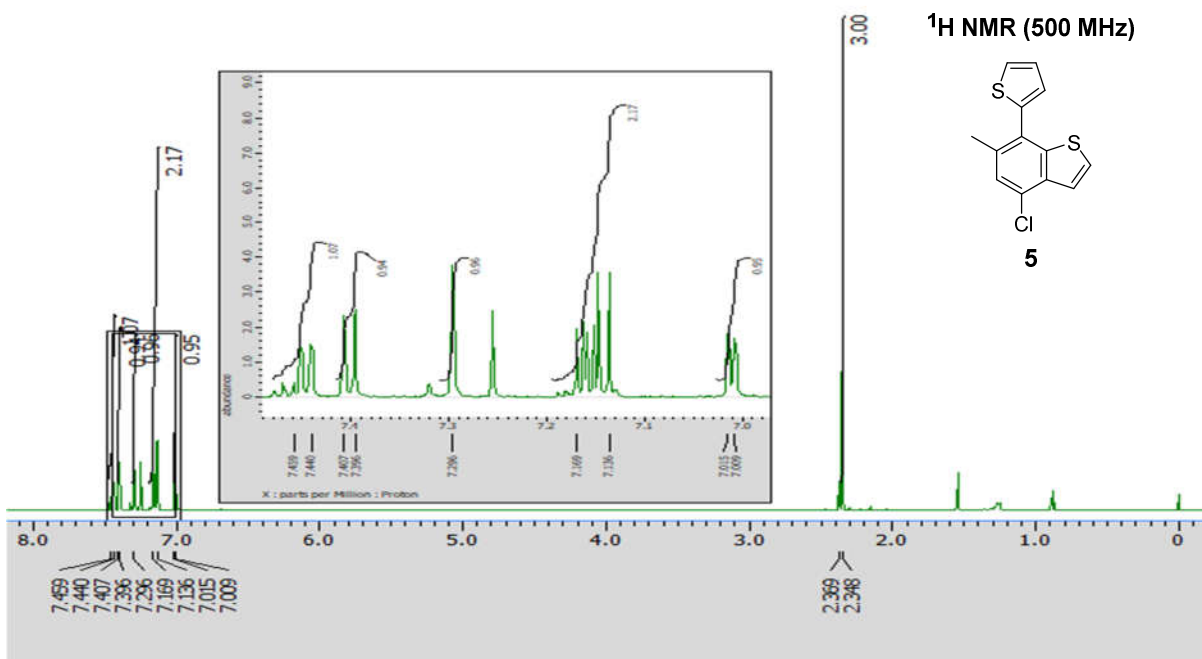

Figure S5: <sup>1</sup>H NMR (500 MHz, CDCl<sub>3</sub>) Spectrum of the Compound 5

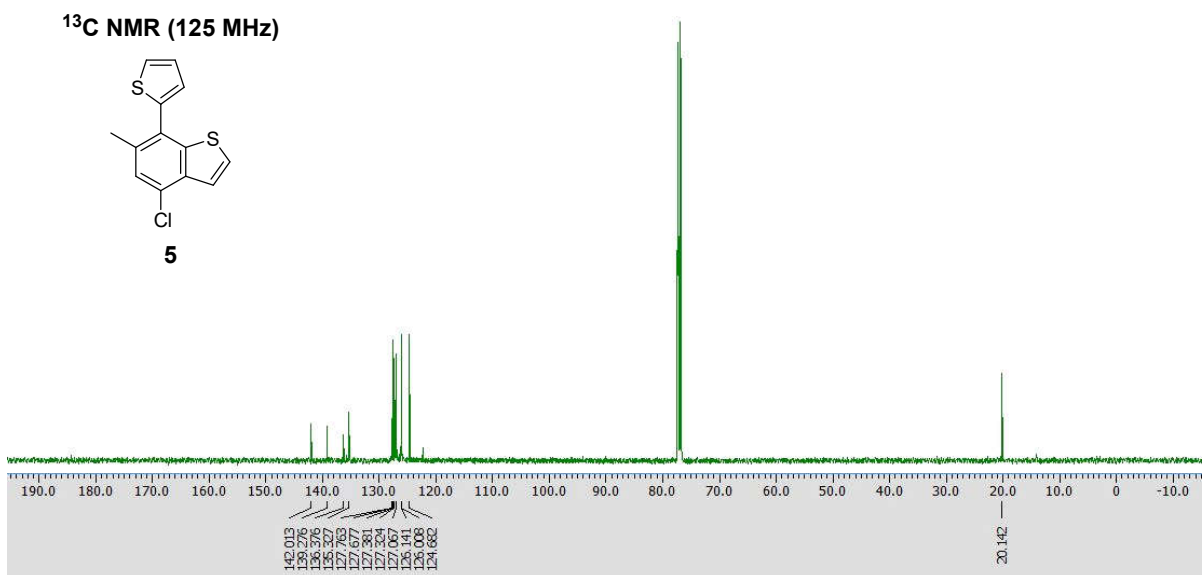

Figure S6: <sup>13</sup>C NMR (125 MHz, CDCl<sub>3</sub>) Spectrum of the Compound 5

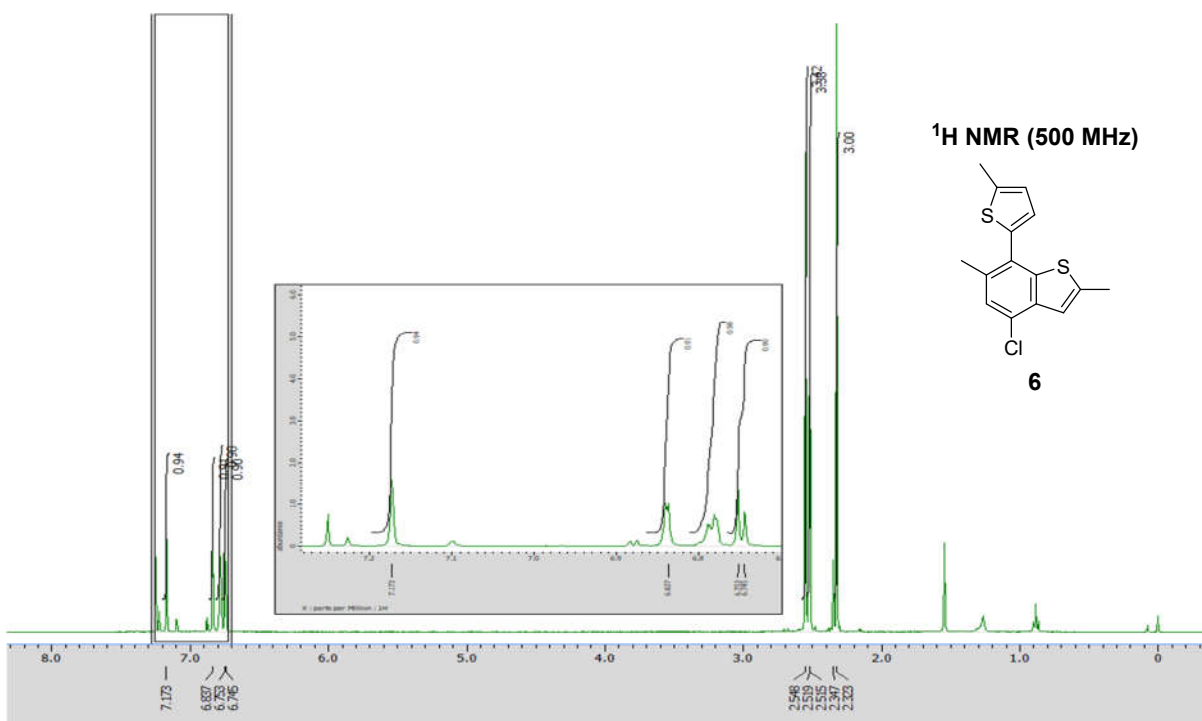

Figure S7: <sup>1</sup>H NMR (500 MHz, CDCl<sub>3</sub>) Spectrum of the Compound 6

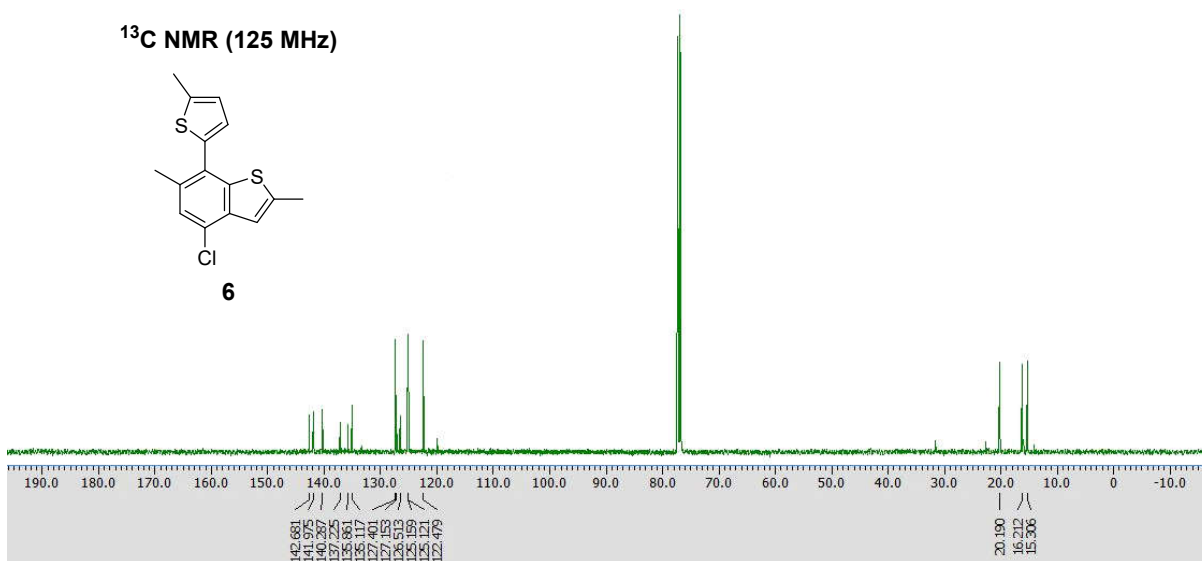

Figure S8: <sup>13</sup>C NMR (125 MHz, CDCl<sub>3</sub>) Spectrum of the Compound 6

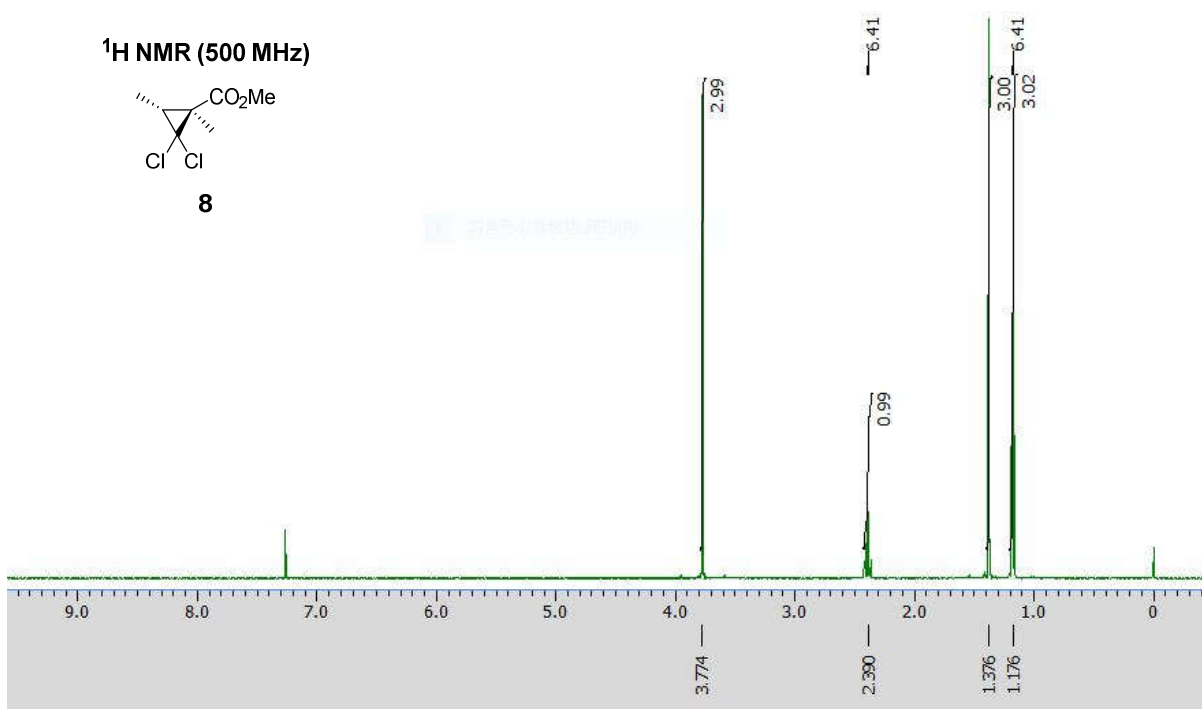

Figure S9: <sup>1</sup>H NMR (500 MHz, CDCl<sub>3</sub>) Spectrum of the Compound 8

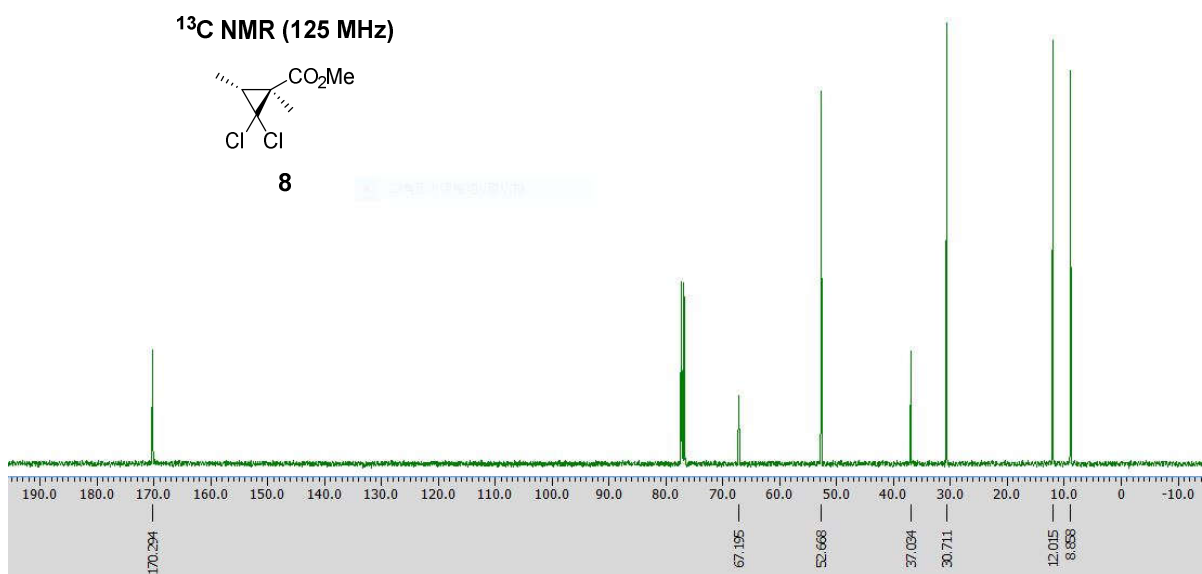

Figure S10: <sup>13</sup>C NMR (125 MHz, CDCl<sub>3</sub>) Spectrum of the Compound 8

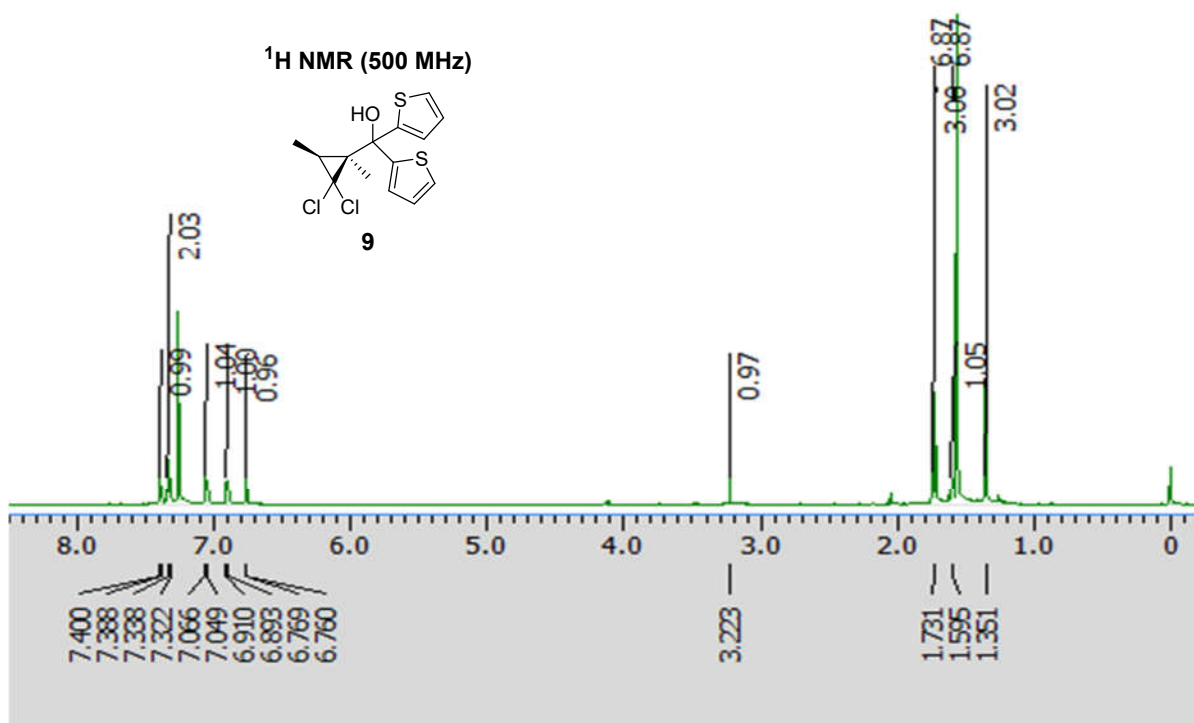

Figure S11:  $^1\text{H}$  NMR (500 MHz,  $\text{CDCl}_3$ ) Spectrum of the Compound 9

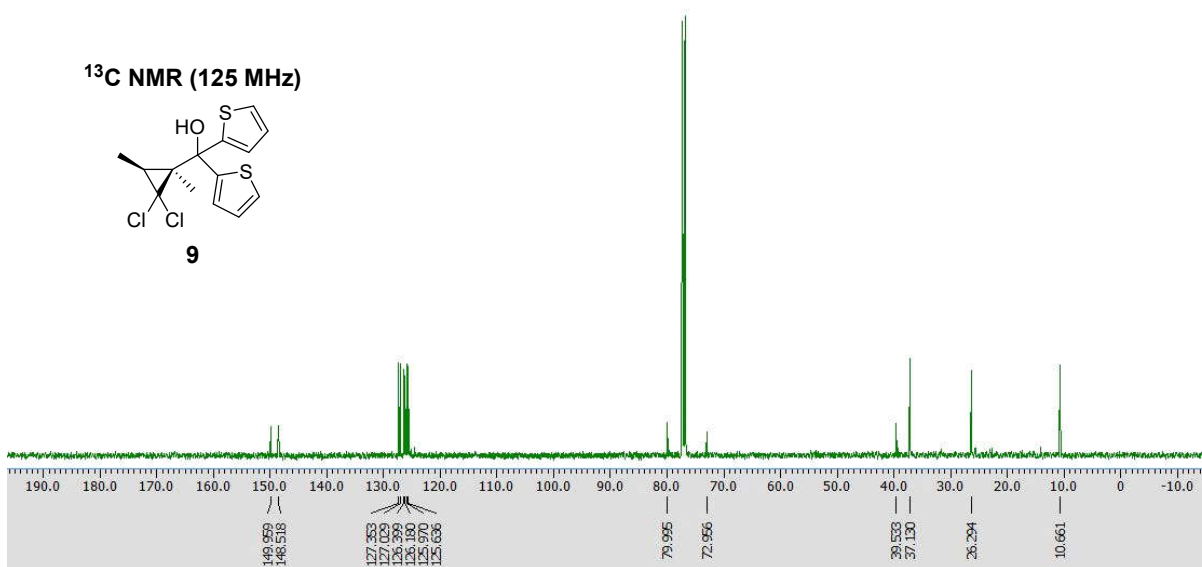

Figure S12:  $^{13}\text{C}$  NMR (125 MHz,  $\text{CDCl}_3$ ) Spectrum of the Compound 9

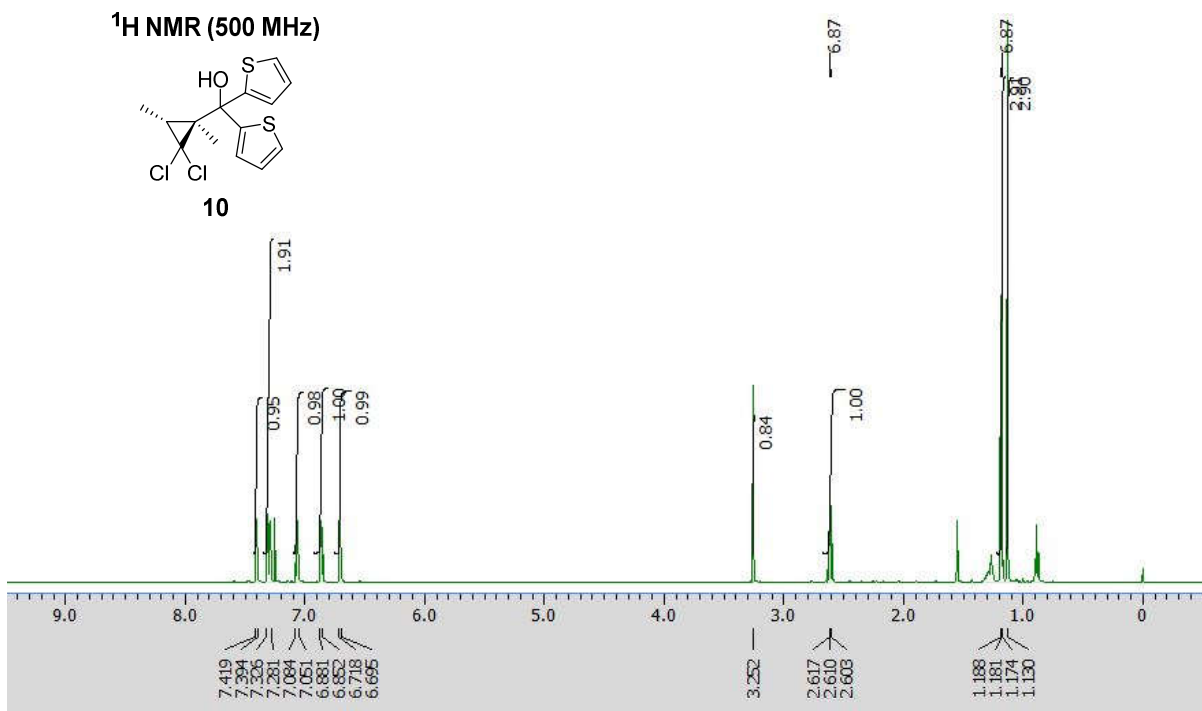

Figure S13: <sup>1</sup>H NMR (500 MHz, CDCl<sub>3</sub>) Spectrum of the Compound 10

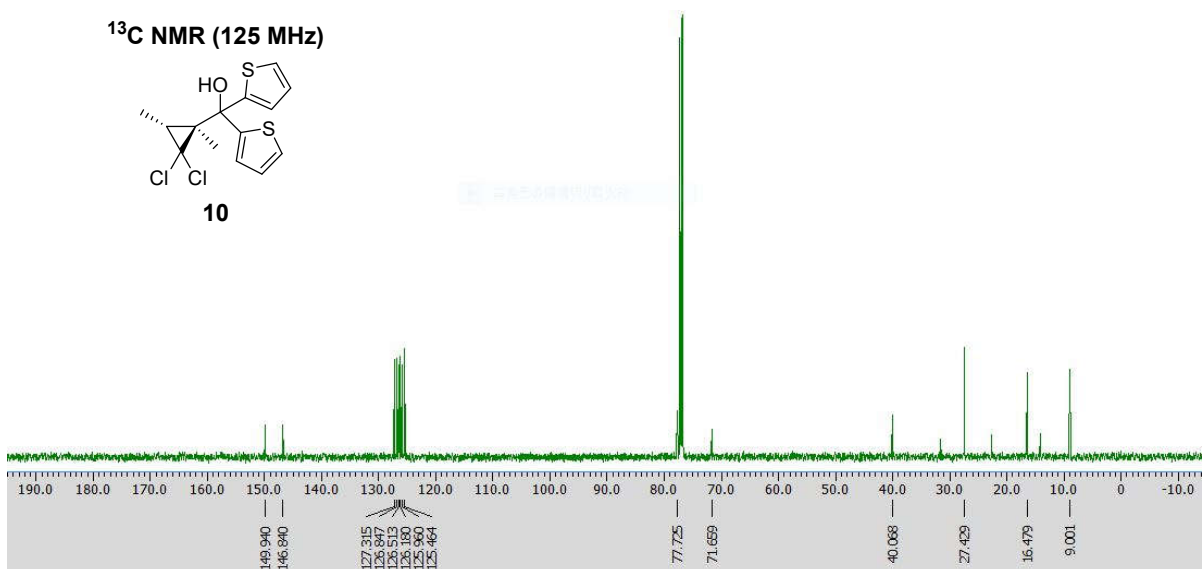

Figure S14: <sup>13</sup>C NMR (125 MHz, CDCl<sub>3</sub>) Spectrum of the Compound 10



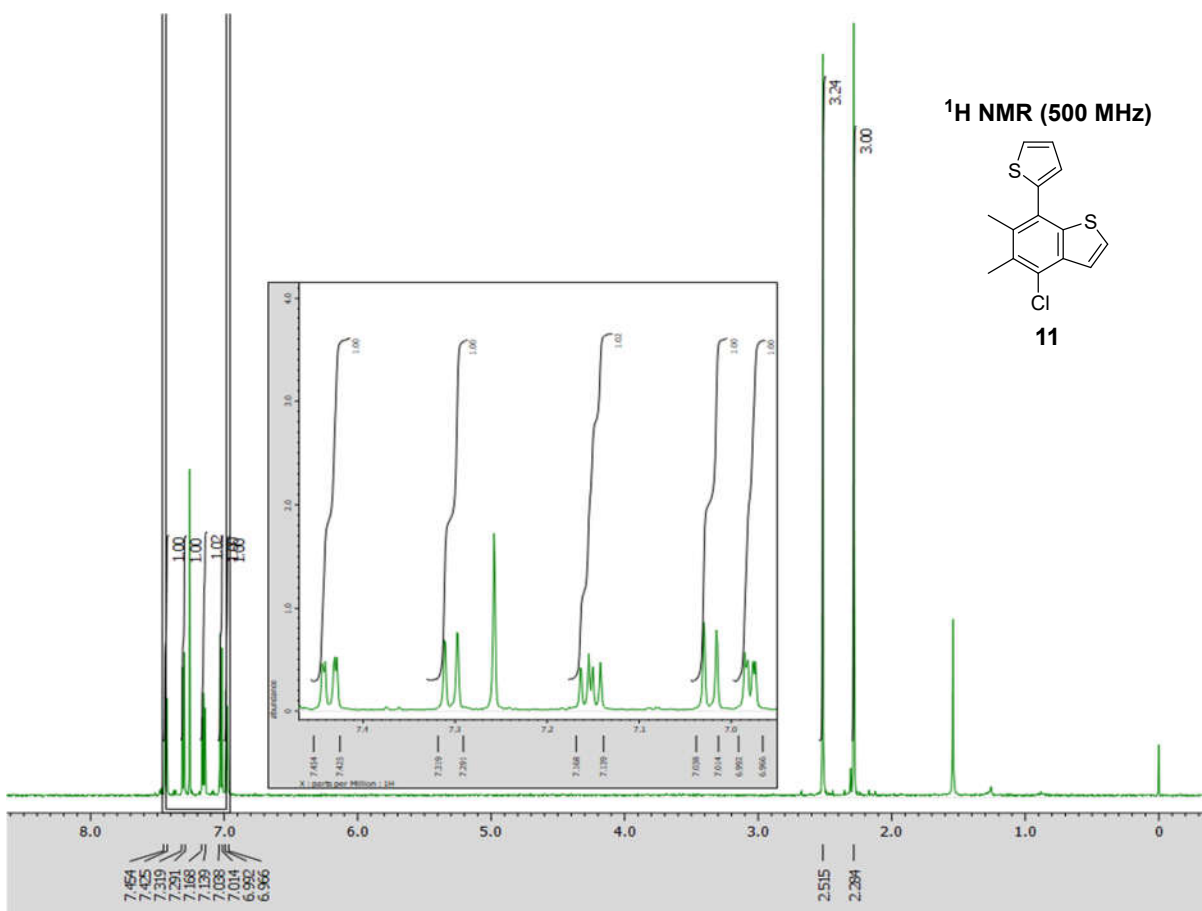

Figure S15: <sup>1</sup>H NMR (500 MHz, CDCl<sub>3</sub>) Spectrum of the Compound 11

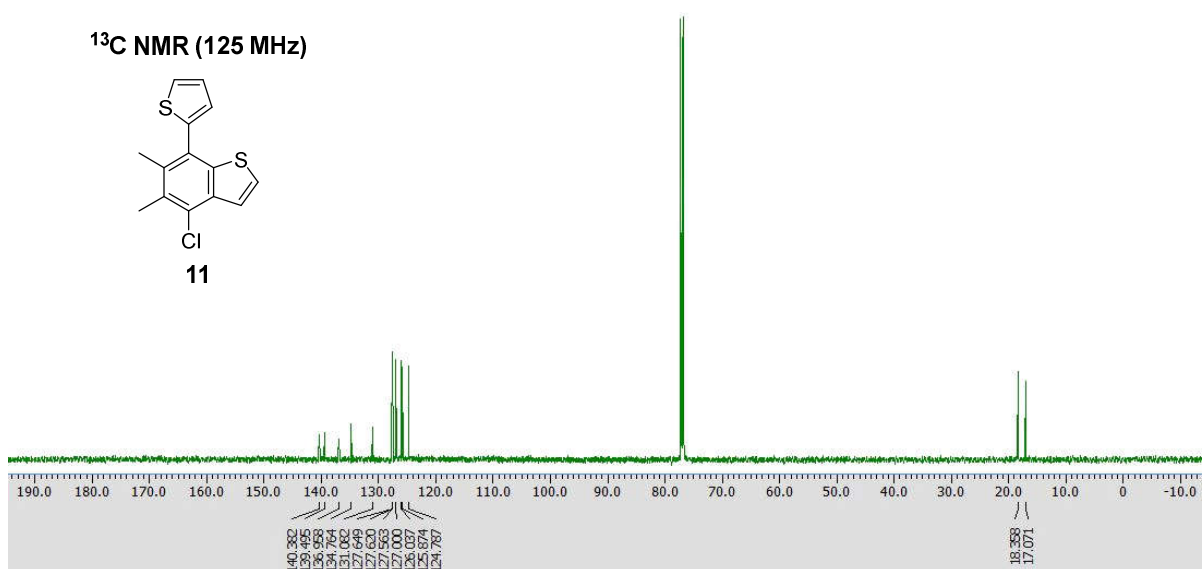

Figure S16: <sup>13</sup>C NMR (125 MHz, CDCl<sub>3</sub>) Spectrum of the Compound 11

<sup>1</sup>H NMR (500 MHz)

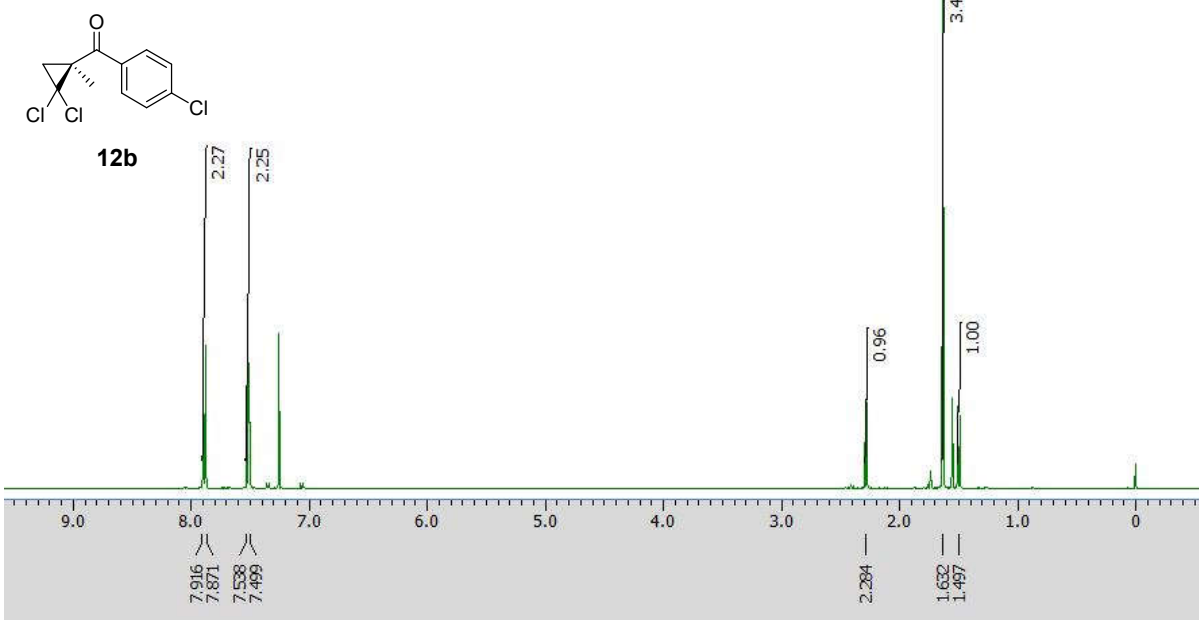

Figure S17: <sup>1</sup>H NMR (500 MHz, CDCl<sub>3</sub>) Spectrum of the Compound **12b**

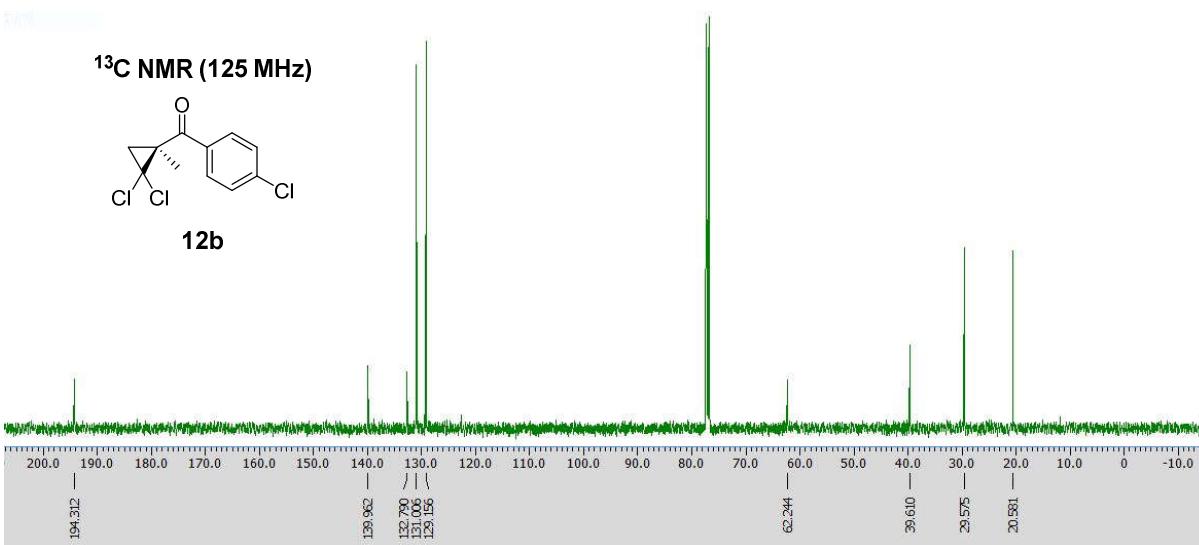

Figure S18: <sup>13</sup>C NMR (125 MHz, CDCl<sub>3</sub>) Spectrum of the Compound **12b**

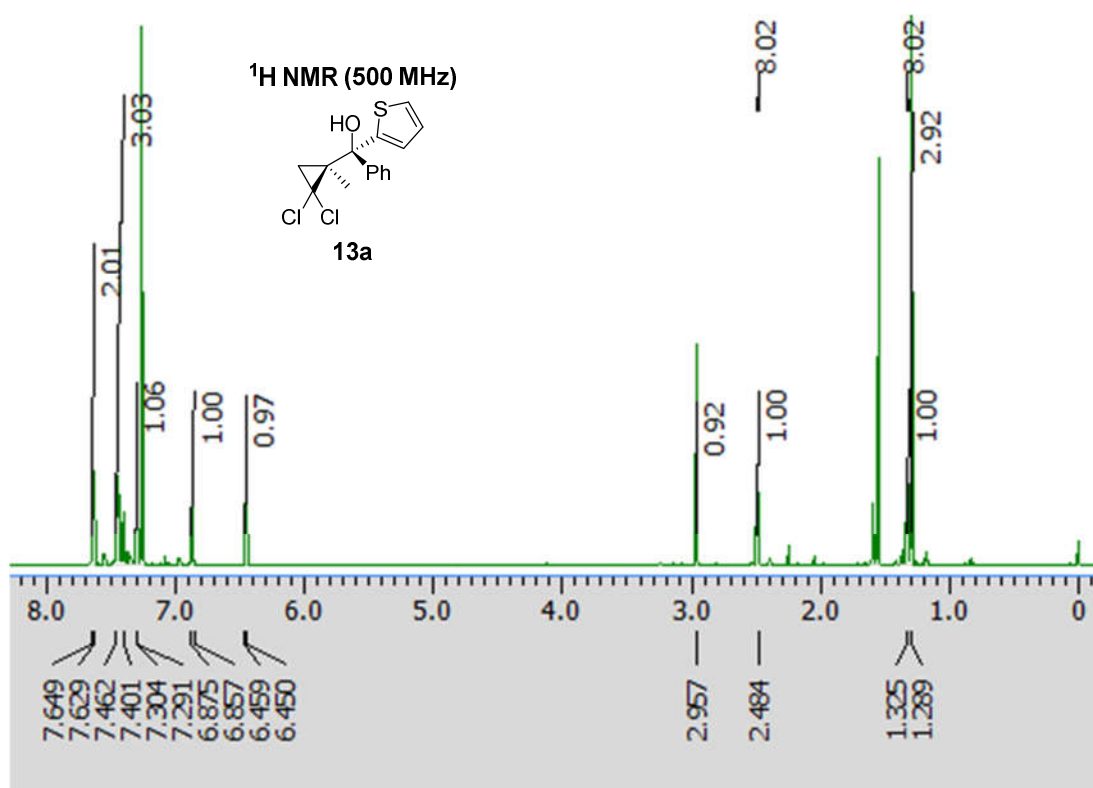

Figure S19: <sup>1</sup>H NMR (500 MHz, CDCl<sub>3</sub>) Spectrum of the Compound 13a

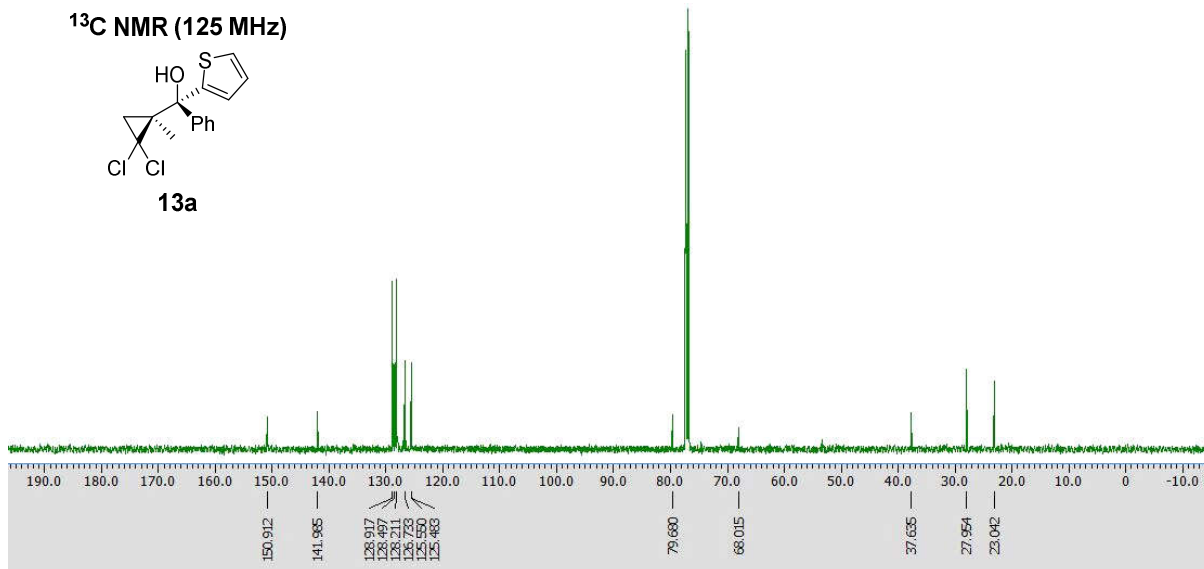

Figure S20: <sup>13</sup>C NMR (125 MHz, CDCl<sub>3</sub>) Spectrum of the Compound 13a

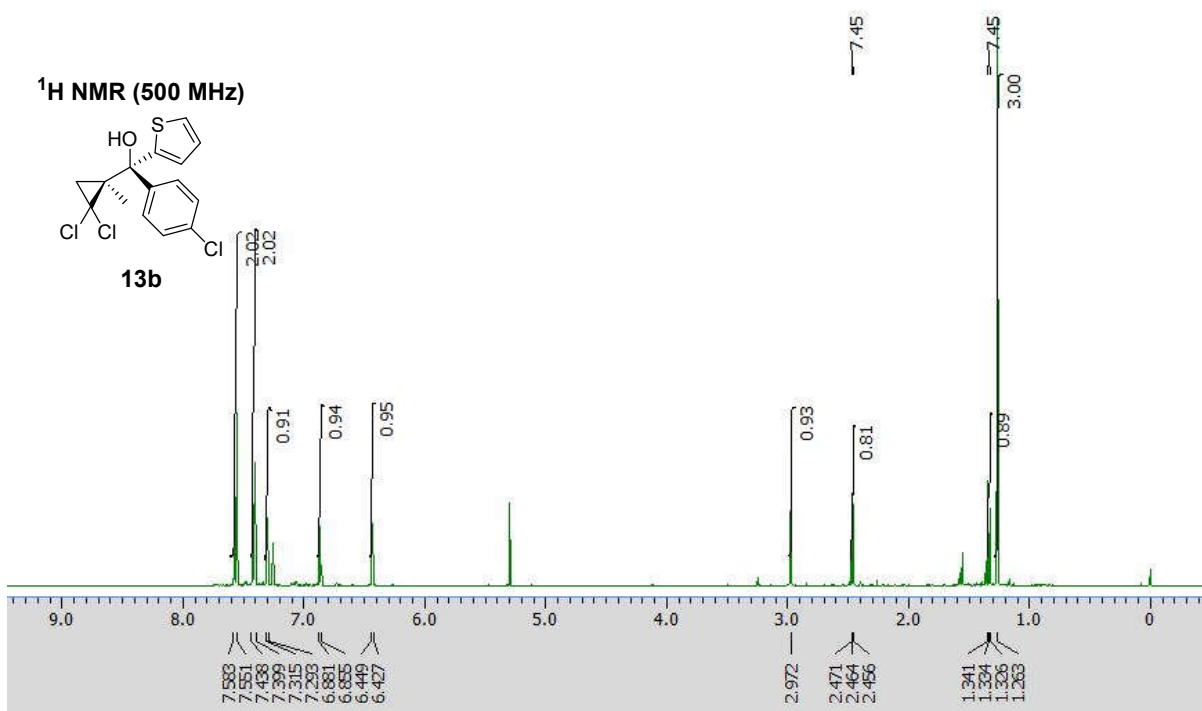

Figure S21: <sup>1</sup>H NMR (500 MHz, CDCl<sub>3</sub>) Spectrum of the Compound 13b

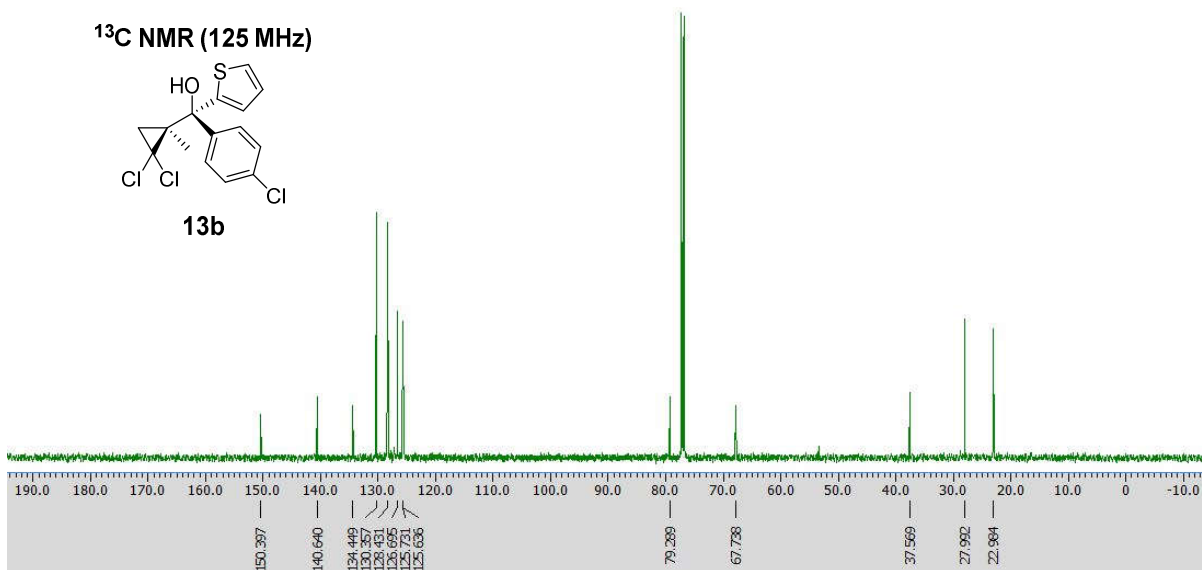

Figure S22: <sup>13</sup>C NMR (125 MHz, CDCl<sub>3</sub>) Spectrum of the Compound 13b

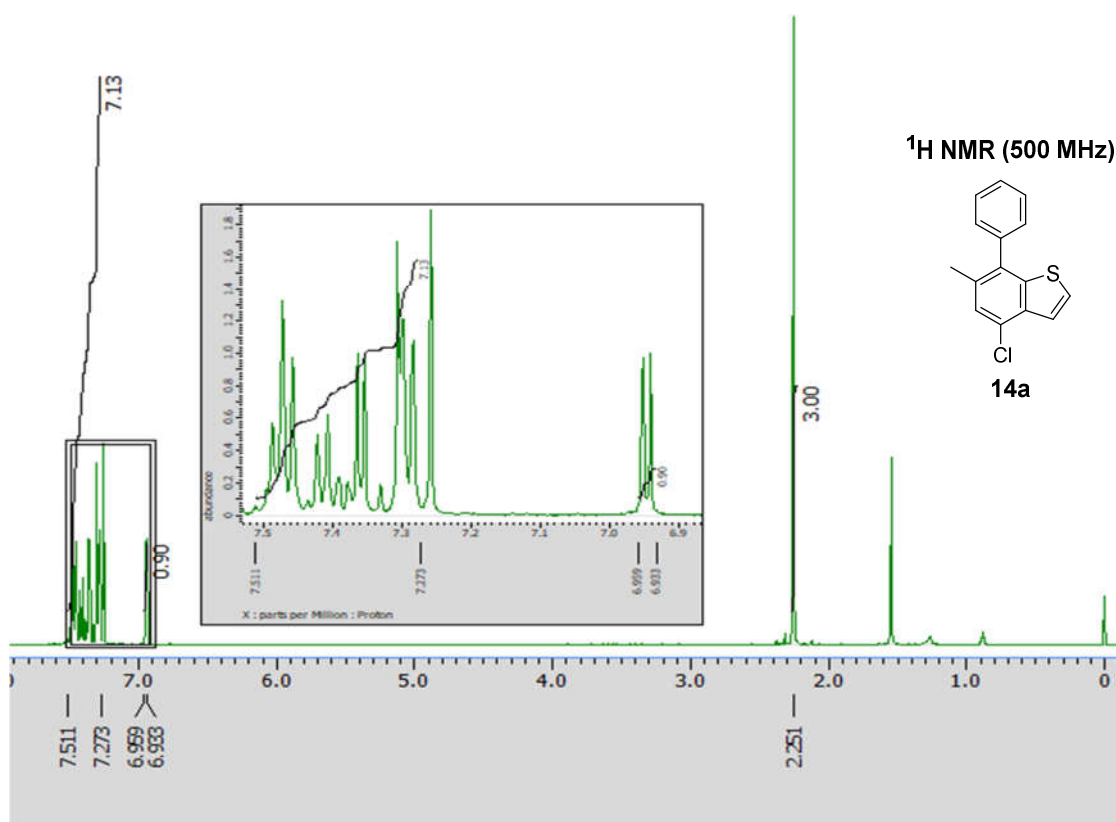

Figure S23: <sup>1</sup>H NMR (500 MHz, CDCl<sub>3</sub>) Spectrum of the Compound 14a

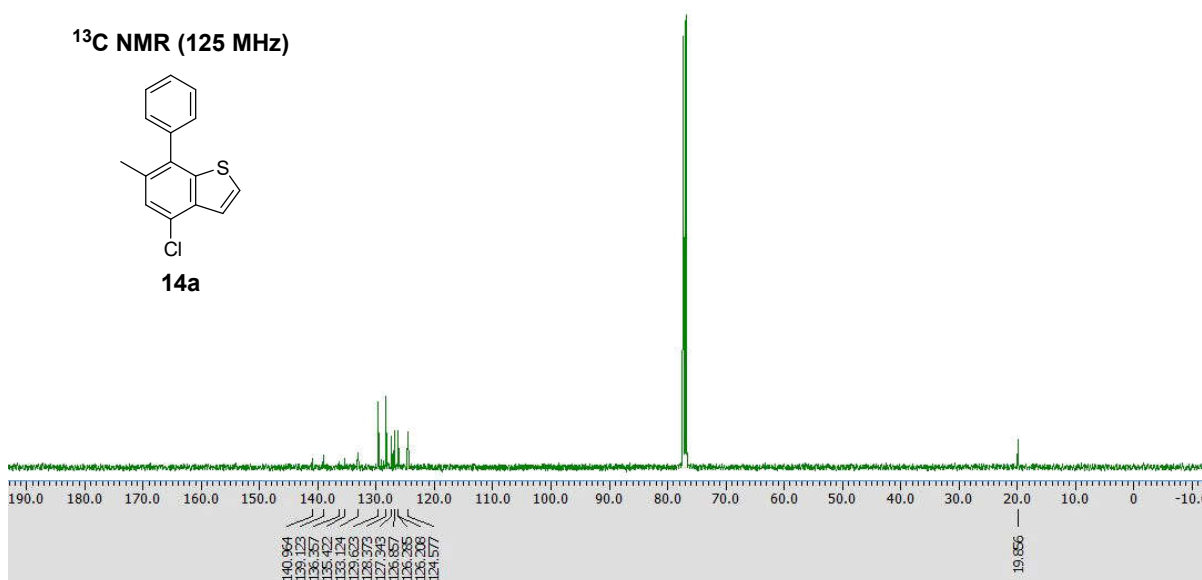

Figure S24: <sup>13</sup>C NMR (125 MHz, CDCl<sub>3</sub>) Spectrum of the Compound 14a

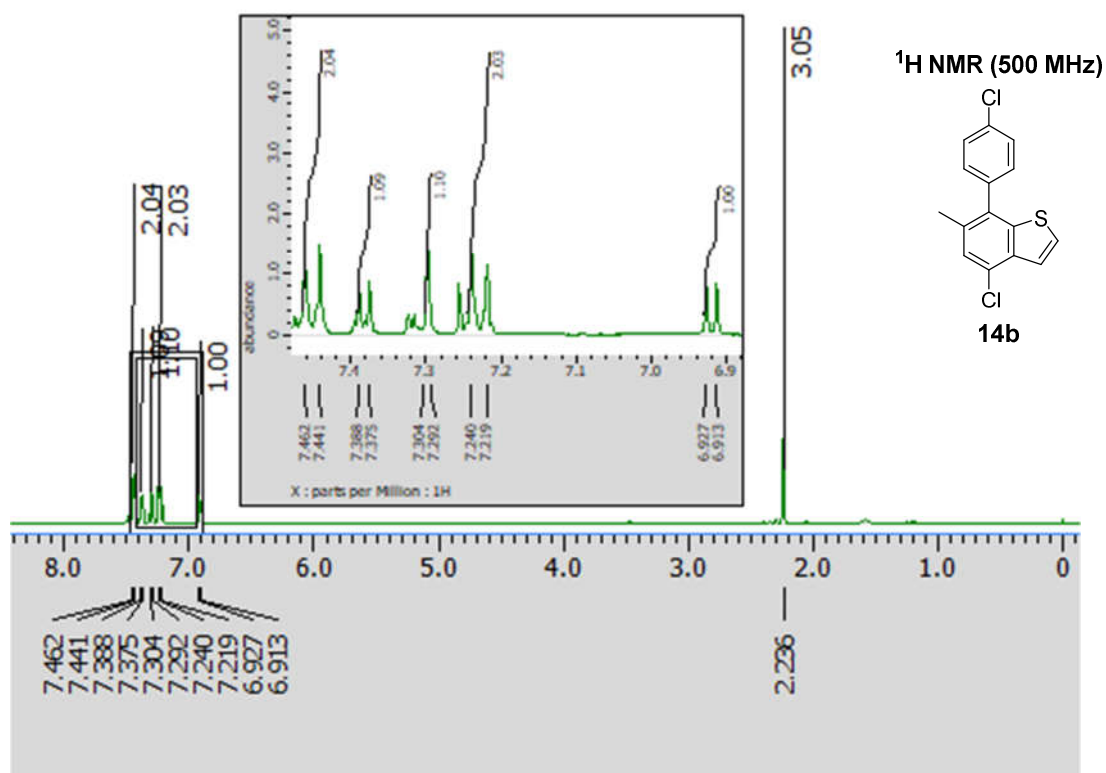

Figure S25: <sup>1</sup>H NMR (500 MHz, CDCl<sub>3</sub>) Spectrum of the Compound **14b**

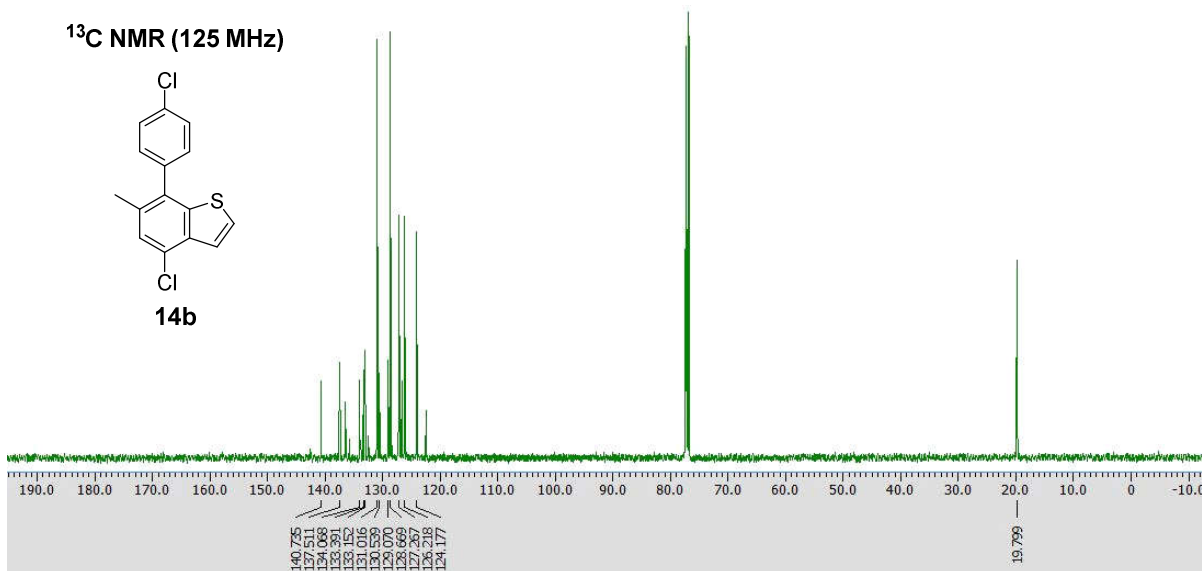

Figure S26: <sup>13</sup>C NMR (125 MHz, CDCl<sub>3</sub>) Spectrum of the Compound **14b**

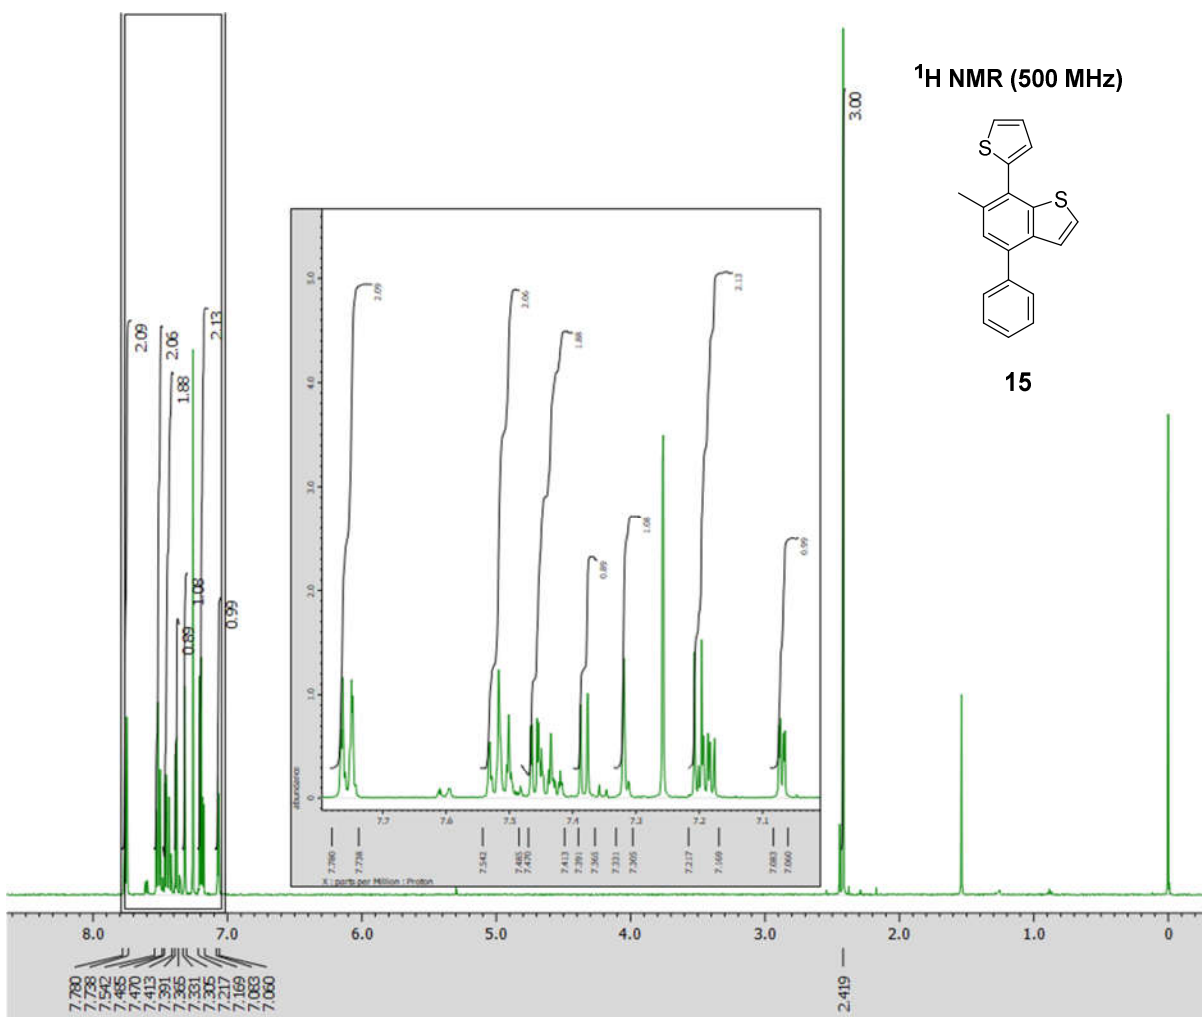

Figure S27: <sup>1</sup>H NMR (500 MHz, CDCl<sub>3</sub>) Spectrum of the Compound 15

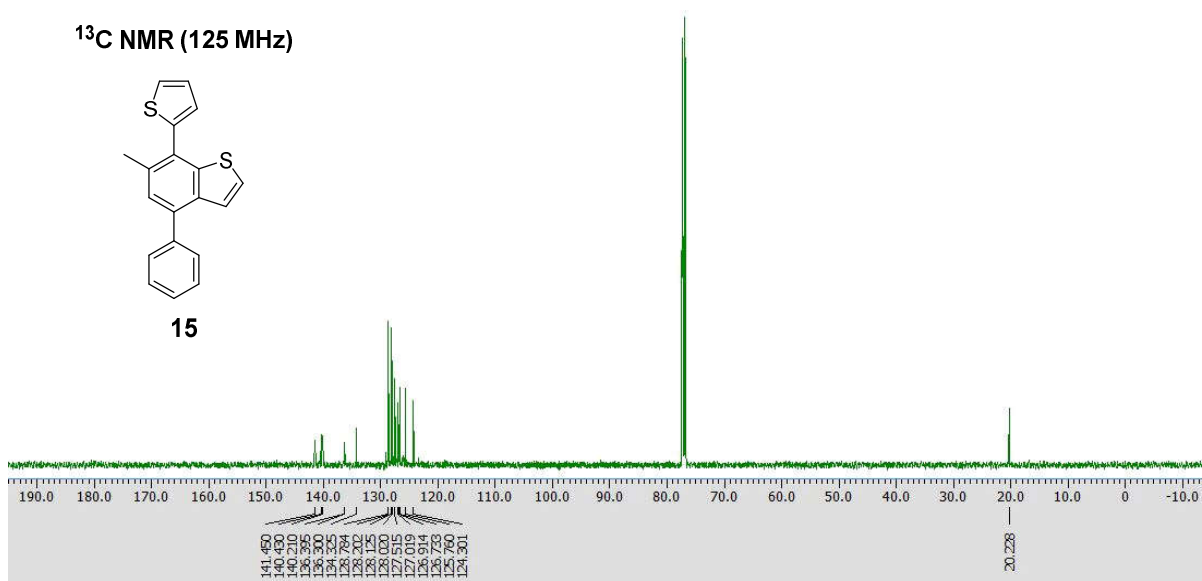

Figure S28: <sup>13</sup>C NMR (125 MHz, CDCl<sub>3</sub>) Spectrum of the Compound 15

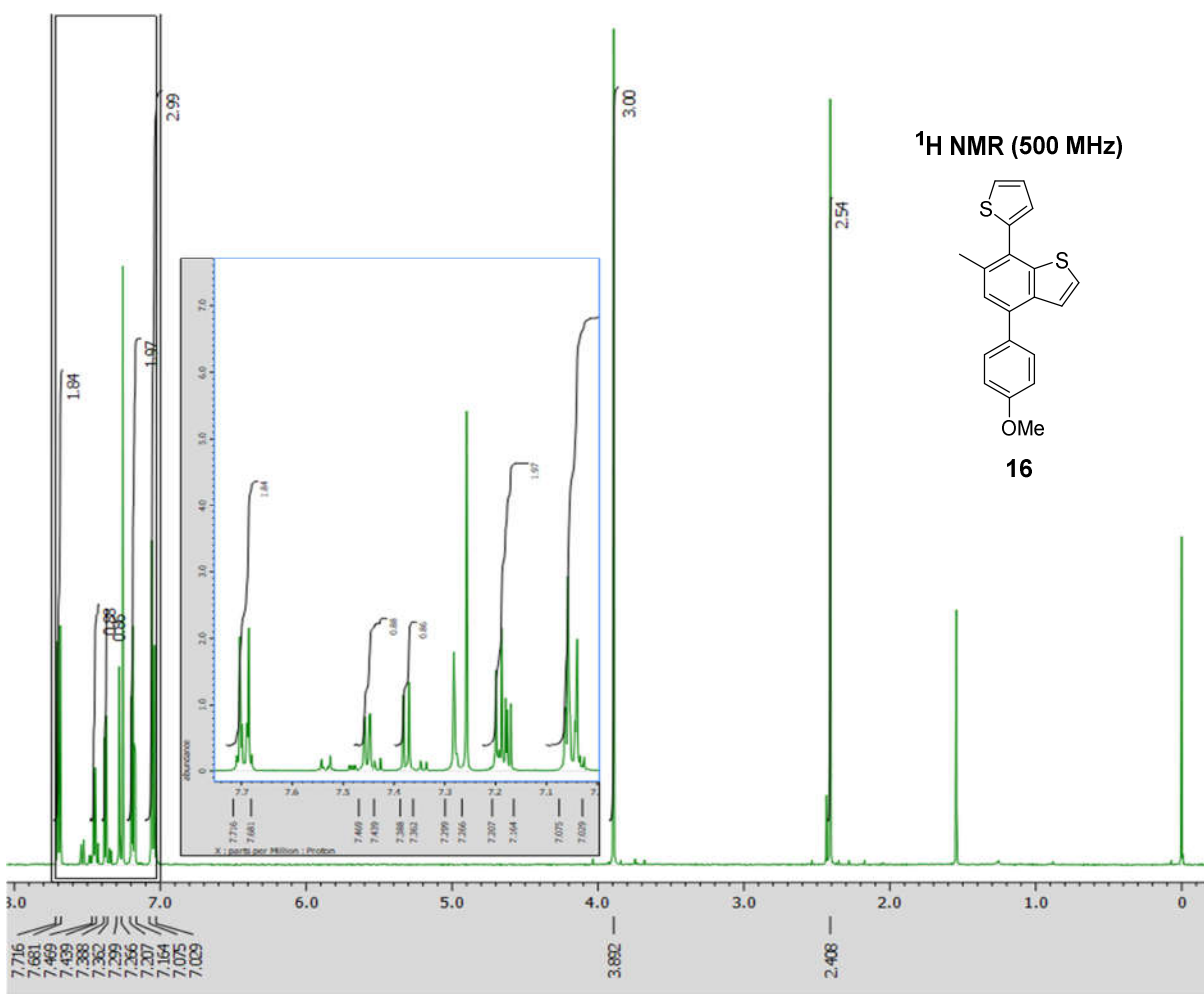

Figure S29: <sup>1</sup>H NMR (500 MHz, CDCl<sub>3</sub>) Spectrum of the Compound 16

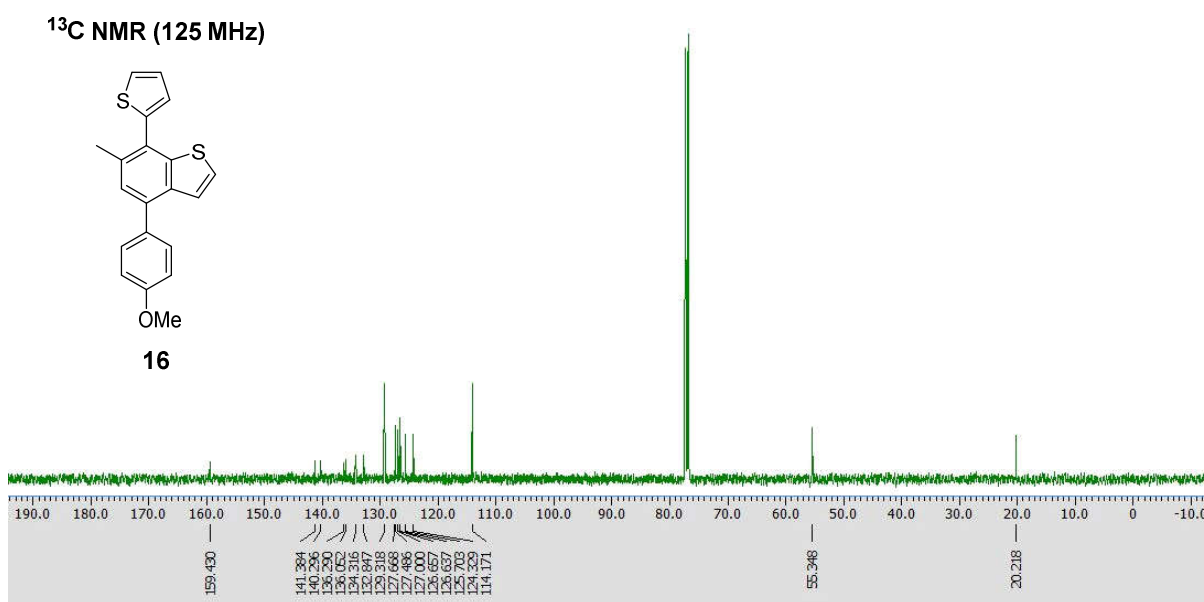

Figure S30: <sup>13</sup>C NMR (125 MHz, CDCl<sub>3</sub>) Spectrum of the Compound 16



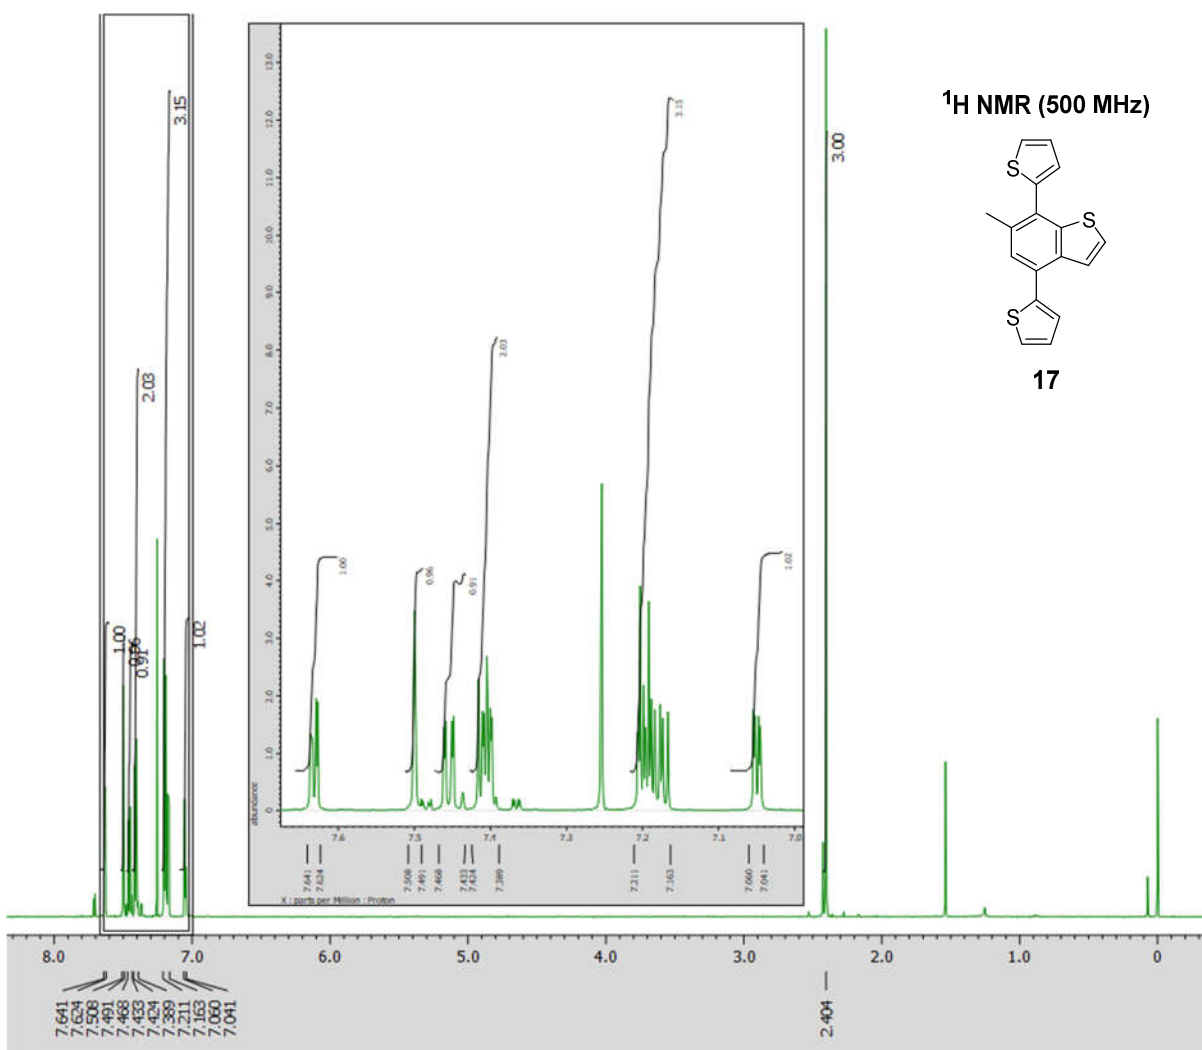

Figure S31: <sup>1</sup>H NMR (500 MHz, CDCl<sub>3</sub>) Spectrum of the Compound 17

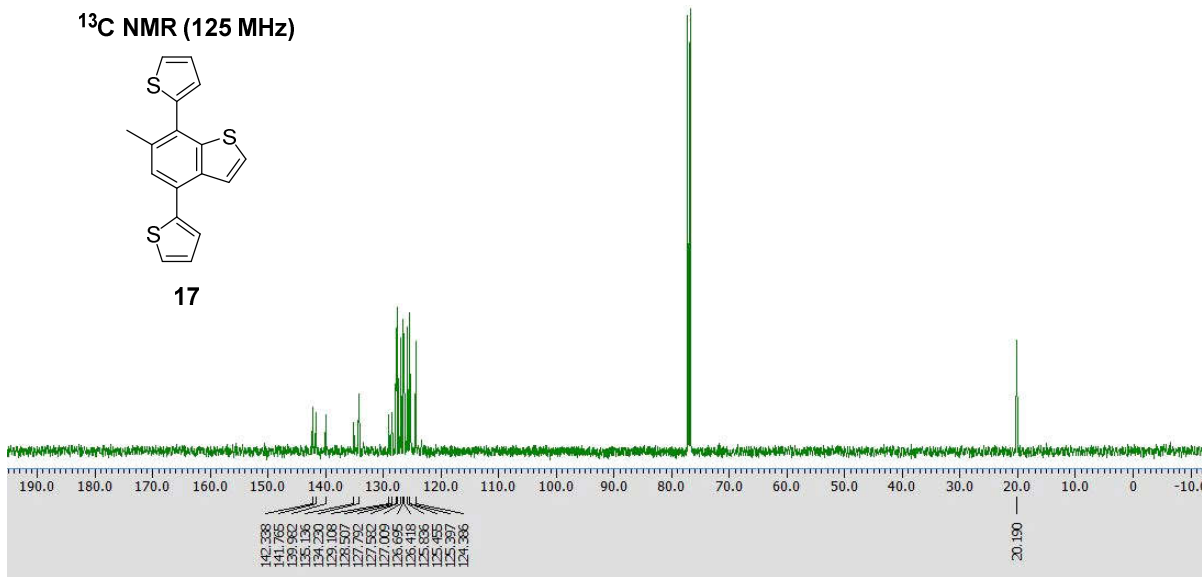

Figure S32: <sup>13</sup>C NMR (125 MHz, CDCl<sub>3</sub>) Spectrum of the Compound 17

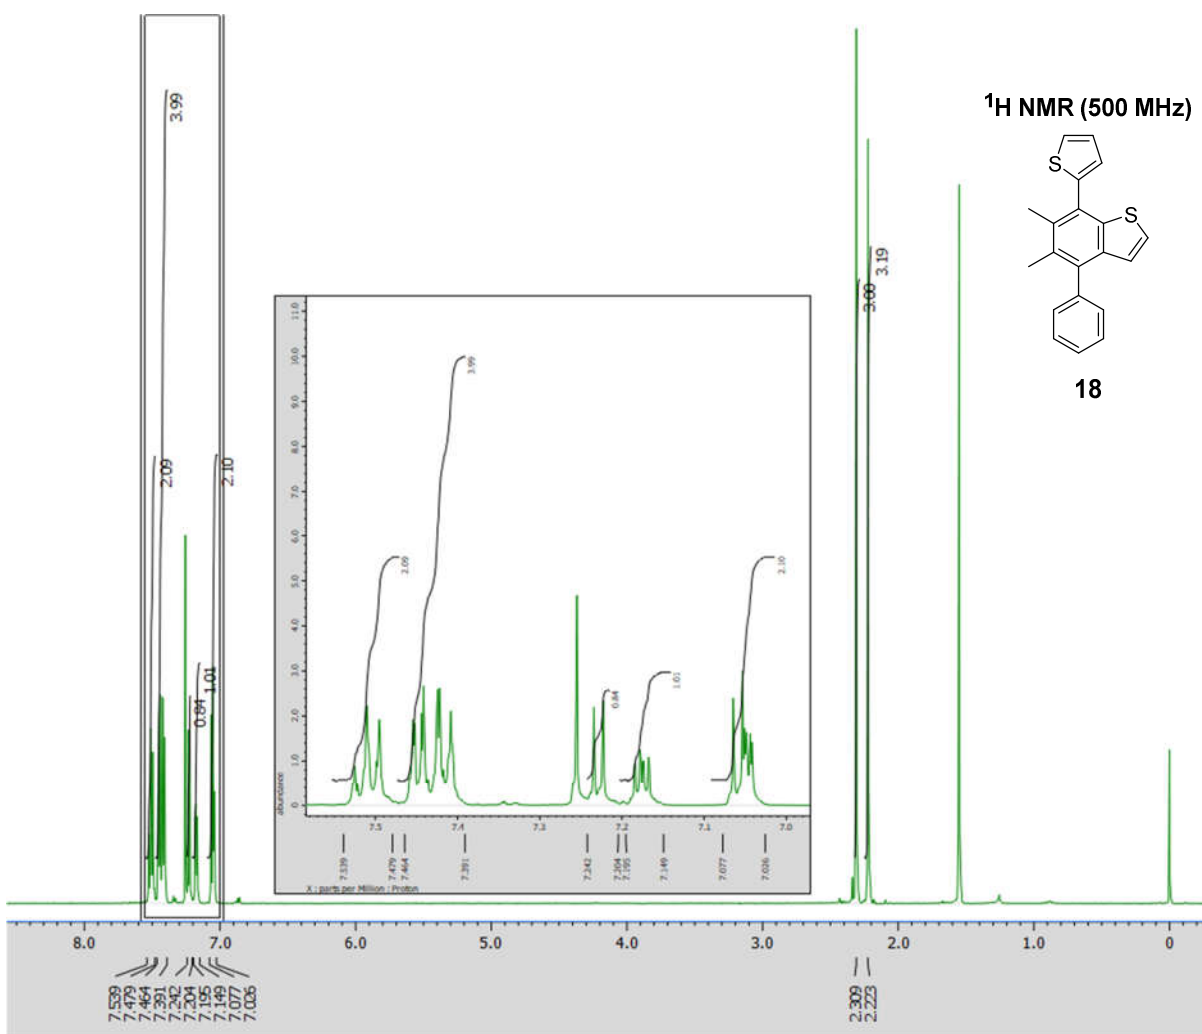

Figure S33: <sup>1</sup>H NMR (500 MHz, CDCl<sub>3</sub>) Spectrum of the Compound 18

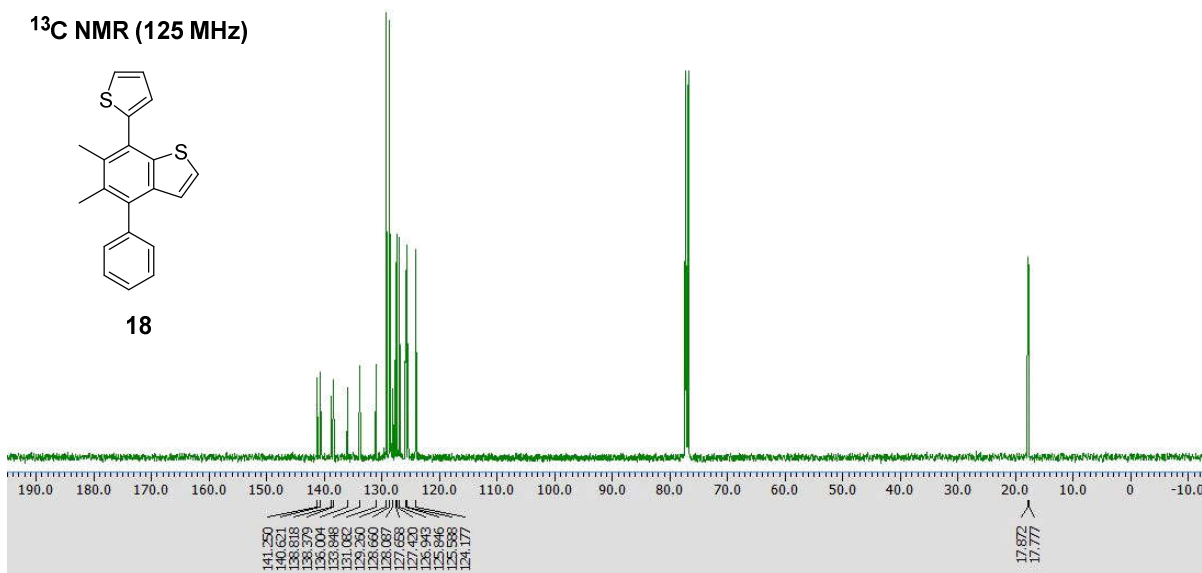

Figure S34: <sup>13</sup>C NMR (125 MHz, CDCl<sub>3</sub>) Spectrum of the Compound 18

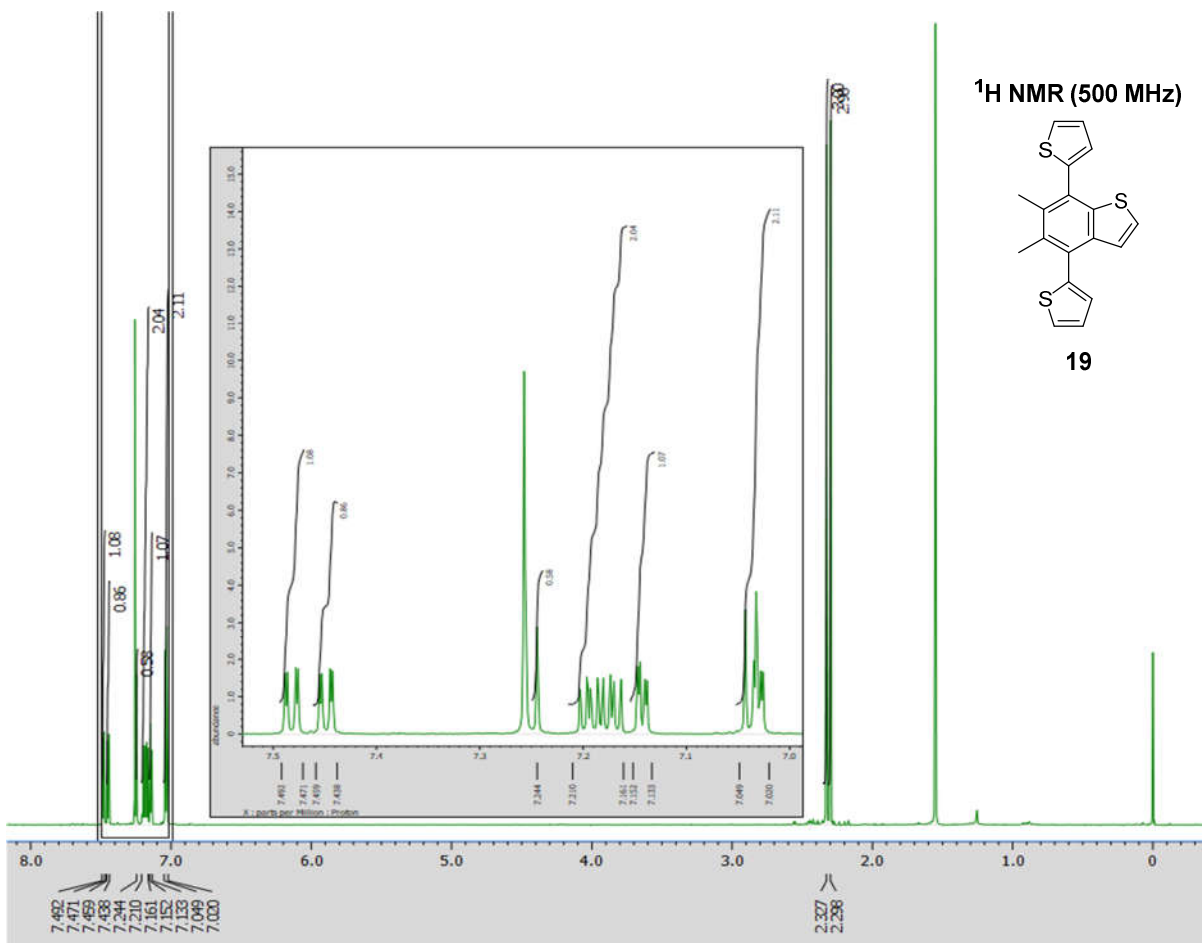

Figure S35: <sup>1</sup>H NMR (500 MHz, CDCl<sub>3</sub>) Spectrum of the Compound 19

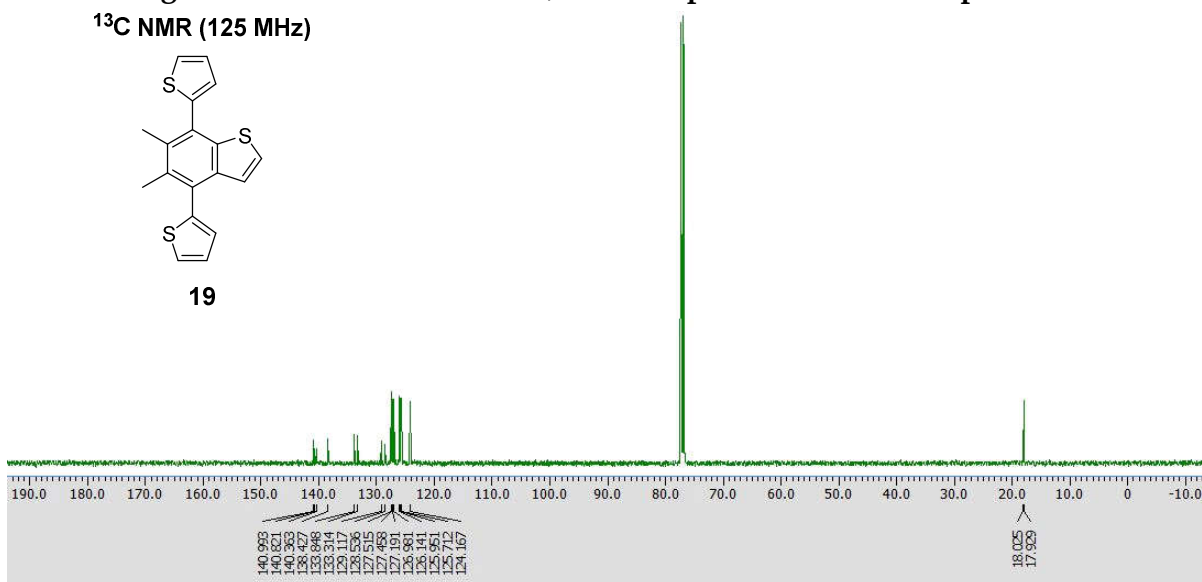

Figure S36: <sup>13</sup>C NMR (125 MHz, CDCl<sub>3</sub>) Spectrum of the Compound 19

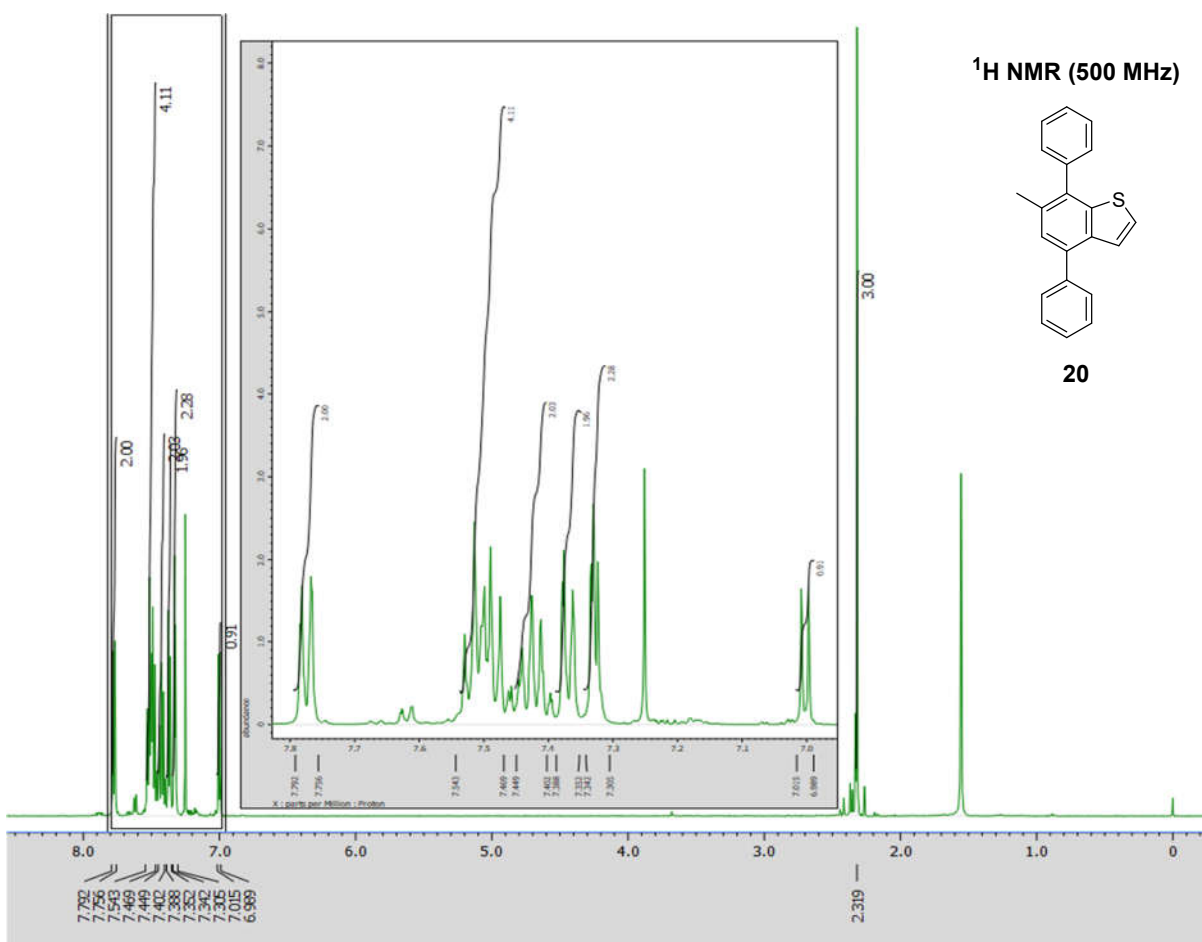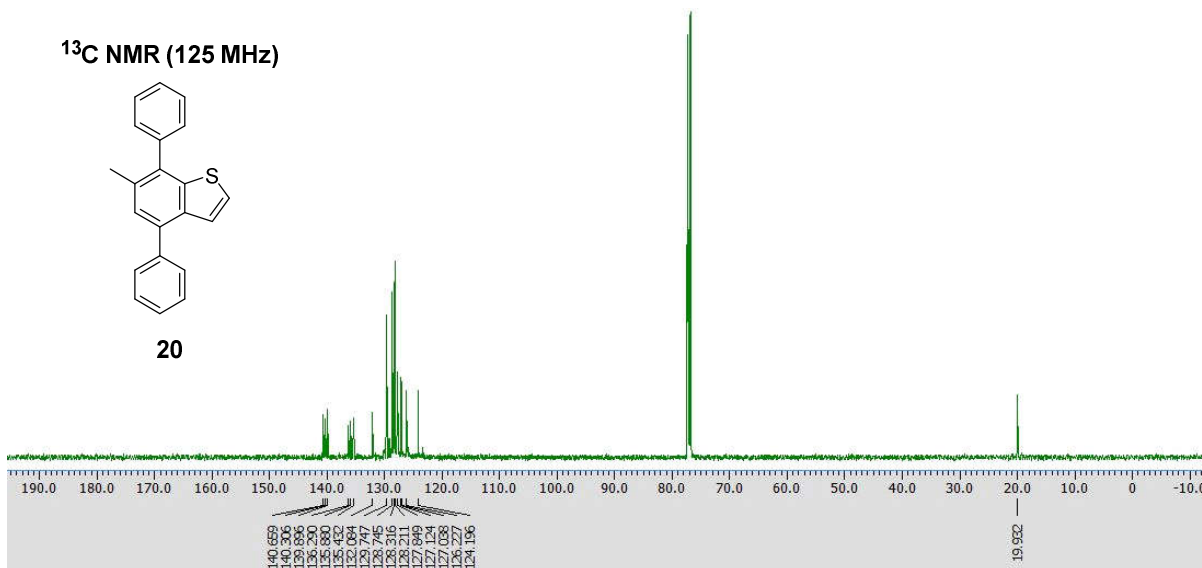

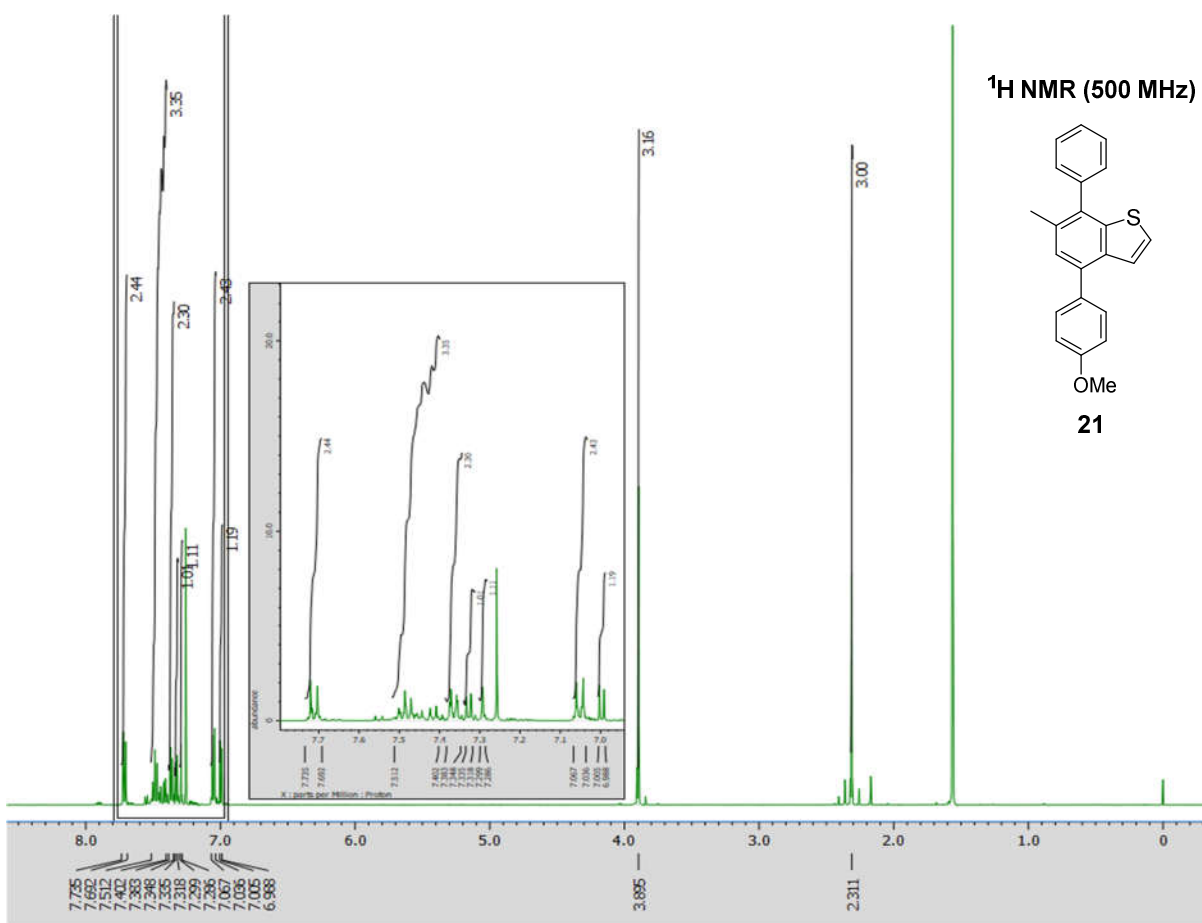

Figure S39: <sup>1</sup>H NMR (500 MHz, CDCl<sub>3</sub>) Spectrum of the Compound **21**

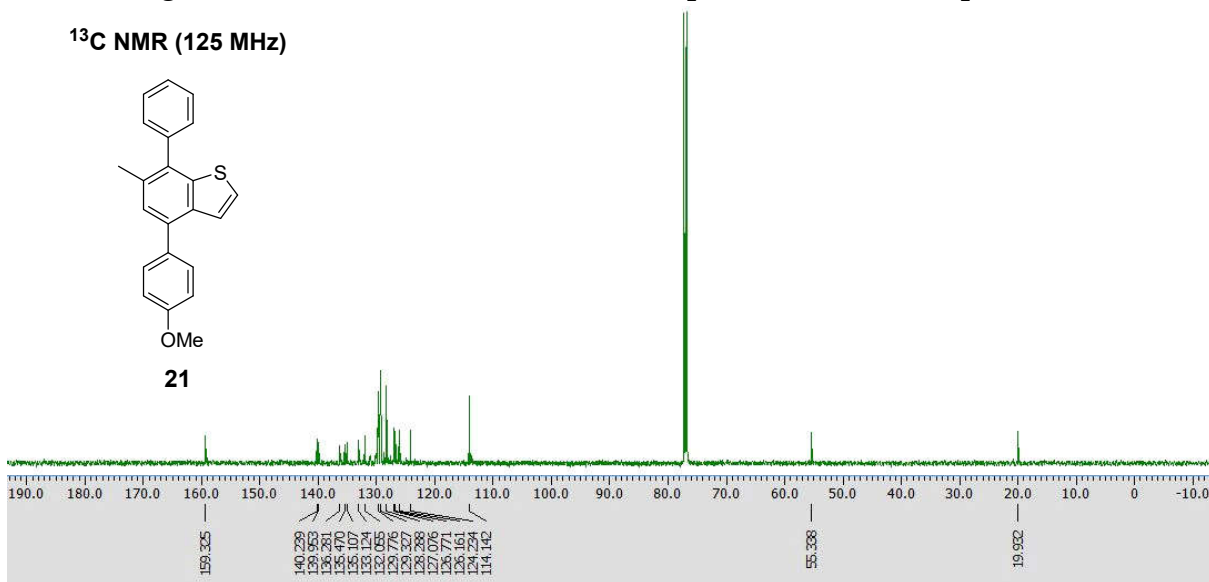

Figure S40: <sup>13</sup>C NMR (125 MHz, CDCl<sub>3</sub>) Spectrum of the Compound **21**

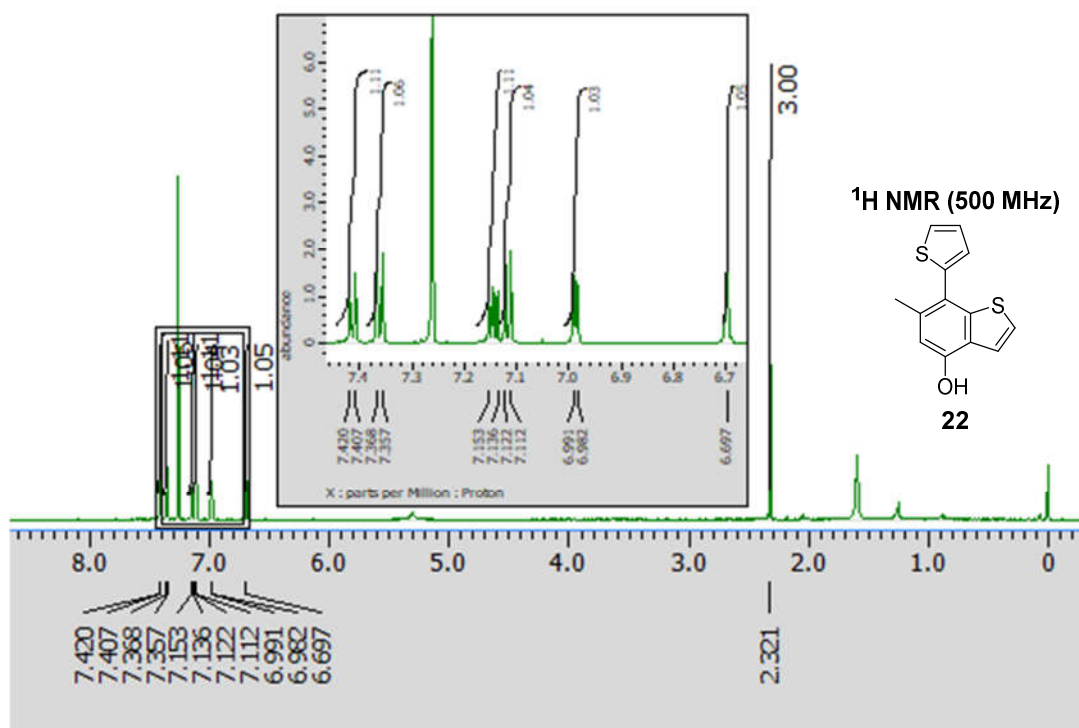

Figure S41: <sup>1</sup>H NMR (500 MHz, CDCl<sub>3</sub>) Spectrum of the Compound 22

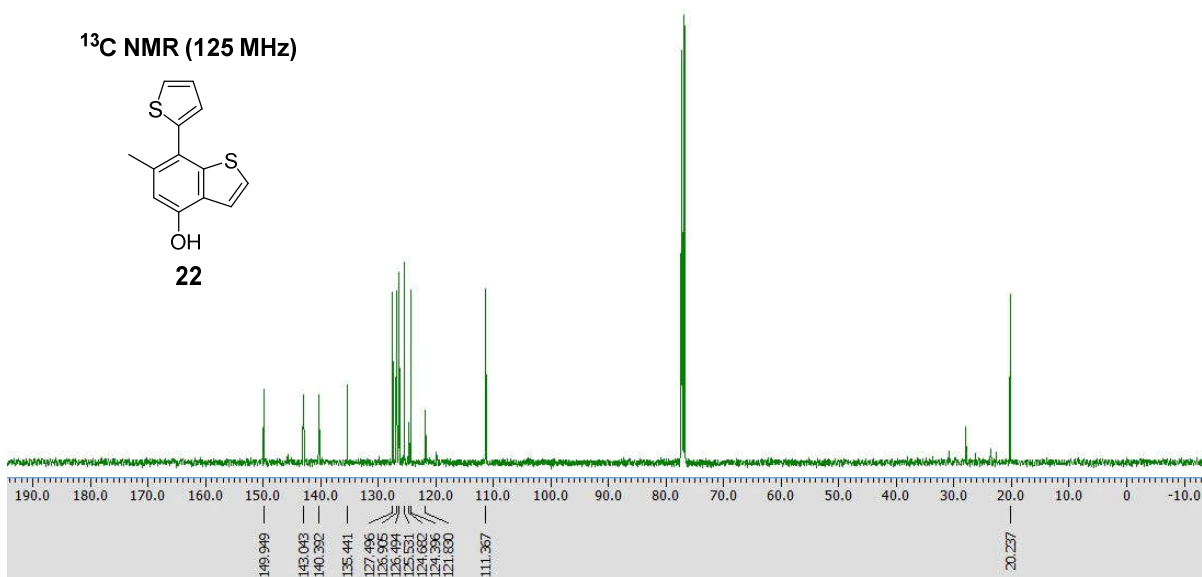

Figure S42: <sup>13</sup>C NMR (125 MHz, CDCl<sub>3</sub>) Spectrum of the Compound 22

**$^1\text{H}$  NMR (500 MHz)**

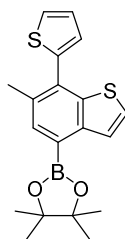

**23**

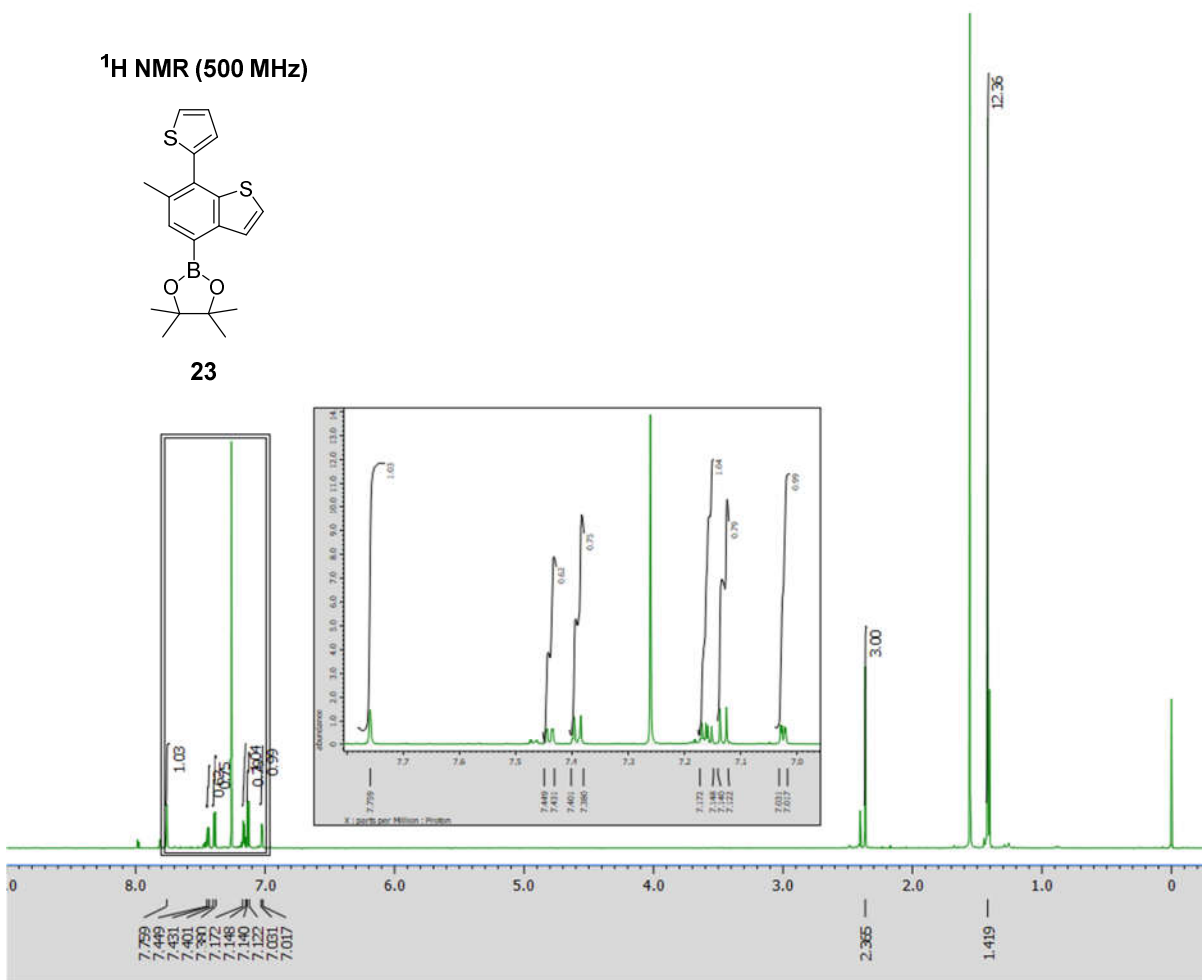

**Figure S43:  $^1\text{H}$  NMR (500 MHz,  $\text{CDCl}_3$ ) Spectrum of the Compound 23**

**$^{13}\text{C}$  NMR (125 MHz)**

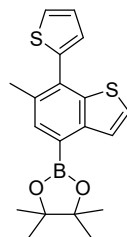

**23**

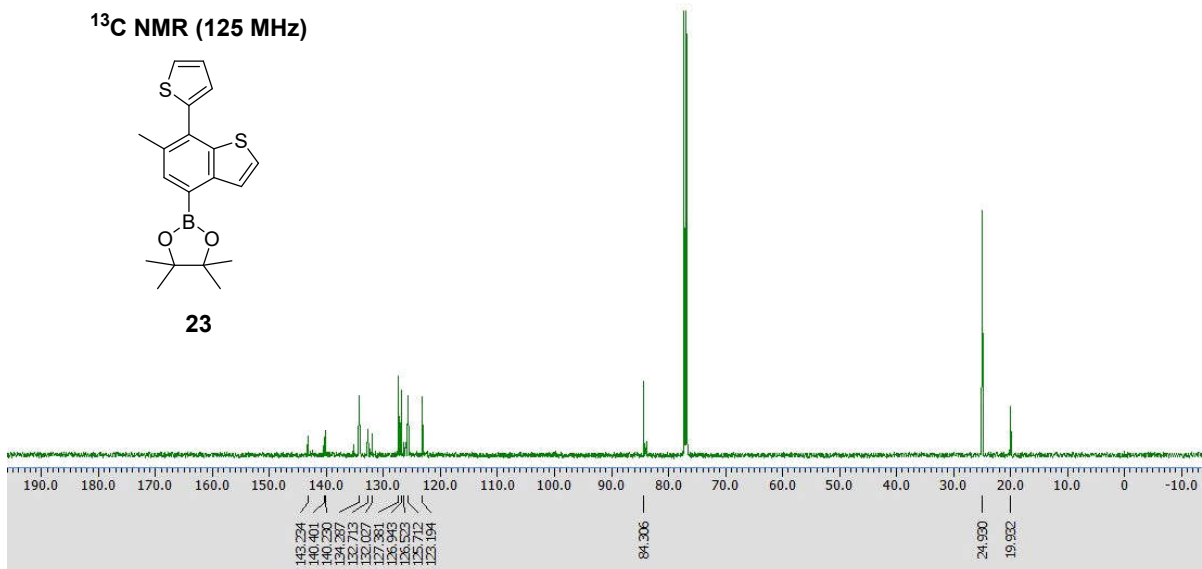

**Figure S44:  $^{13}\text{C}$  NMR (125 MHz,  $\text{CDCl}_3$ ) Spectrum of the Compound 23**

### Electronic Supporting Information of Free Energy Calculation

Free energy calculation with structure prediction was carried out by Spartan'18 vl.1.0. Both electronstatic map and HOMO map of the key cation intermediate indicated higher potential of the benzene core than that of the thiophene one. Despite the calculation results, the orientation of cyclization was clearly reversed to afford benzothiophenes, probably because benzannulations through the chelation pathway predominated over that through inherent non-chelation pathway.

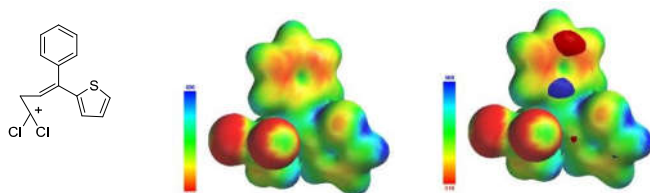

Electronstatic map

HOMO map

SPARTAN '18 MECHANICS PROGRAM: (Win/64b)

Release 1.1.0

Frequency Calculation

Adjusted 3 (out of 84) low frequency modes

Reason for exit: Successful completion

Mechanics CPU Time : .05

Mechanics Wall Time: .05

SPARTAN '18 Quantum Mechanics Driver: (Win/64b)

Release 1.1.0

Job type: Geometry optimization.

Method: RB3LYP

Basis set: 6-31G(D)

Number of basis functions: 289

Charge : +1

Number of electrons: 144

Parallel Job: 4 threads

SCF model:



A restricted hybrid HF-DFT SCF calculation will be performed using Pulay DIIS + Geometric Direct Minimization

Optimization:

|       | Step         | Energy   | Max          |
|-------|--------------|----------|--------------|
| Grad. | Max Dist.    |          |              |
| 1     | -1858.343993 | 0.031568 |              |
|       | 0.145783     |          |              |
| 2     | -1858.354386 | 0.015594 |              |
|       | 0.164037     | 3        | -1858.359075 |
|       | 0.013586     | 0.157298 |              |
| 4     | -1858.363126 | 0.009610 |              |
|       | 0.144933     |          |              |
| 5     | -1858.366715 | 0.008565 |              |
|       | 0.120323     |          |              |
| 6     | -1858.370170 | 0.008484 |              |
|       | 0.105662     | 7        | -1858.373775 |
|       | 0.008219     | 0.102849 |              |
| 8     | -1858.377397 | 0.011830 |              |
|       | 0.106177     |          |              |
| 9     | -1858.380156 | 0.021907 |              |
|       | 0.092763     |          |              |
| 10    | -1858.382868 | 0.025624 |              |
|       | 0.109034     |          |              |
| 11    | -1858.382728 | 0.025570 |              |
|       | 0.101842     |          |              |
| 12    | -1858.388255 | 0.007980 |              |
|       | 0.079968     | 13       | -1858.389199 |
|       | 0.008362     | 0.113925 |              |
| 14    | -1858.388929 | 0.017324 |              |
|       | 0.077904     |          |              |
| 15    | -1858.390038 | 0.003001 |              |
|       | 0.084951     |          |              |
| 16    | -1858.389595 | 0.008815 |              |
|       | 0.053453     |          |              |
| 17    | -1858.390338 | 0.002467 |              |
|       | 0.038322     |          |              |

|    |              |          |              |
|----|--------------|----------|--------------|
| 18 | -1858.390437 | 0.001734 |              |
|    | 0.053614     |          |              |
| 19 | -1858.390525 | 0.002765 |              |
|    | 0.017620     |          |              |
| 20 | -1858.390568 | 0.000495 |              |
|    | 0.009459     | 21       | -1858.390573 |
|    | 0.000721     | 0.005781 | 22           |
|    | -1858.390576 | 0.000207 |              |
|    | 0.001555     |          |              |

<step 2>

Job type: Frequency calculation.

Method: RB3LYP

Basis set: 6-31G(D)

Reason for exit: Successful completion

Quantum Calculation CPU Time :

1:15:47.25

Quantum Calculation Wall Time:

20:02.05

Cartesian coordinates

| Atom | X         | Y         | Z         |
|------|-----------|-----------|-----------|
| C    | 0.388218  | 0.794267  | -3.873766 |
| C    | -0.024720 | 0.300190  | -1.137853 |
| C    | 0.528621  | 1.835649  | -2.946288 |
| C    | 0.023157  | -0.486973 | -3.447431 |
| C    | -0.176797 | -0.738321 | -2.097570 |
| C    | 0.305875  | 1.602656  | -1.598521 |
| C    | -0.256352 | 0.052169  | 0.269731  |
| C    | -0.783667 | 1.181612  | 1.070959  |
| C    | 0.011203  | -1.198646 | 0.865227  |
| S    | 1.253751  | -2.299712 | 0.231958  |
| C    | 0.940267  | -3.426428 | 1.469625  |
| C    | -0.082040 | -3.034486 | 2.327046  |

|           |           |           |           |
|-----------|-----------|-----------|-----------|
| C         | -0.588003 | -1.774337 |           |
| 2.004904  | C         | -0.776214 |           |
| 1.330088  | 2.590399  |           |           |
| H         | 0.547840  | 0.987182  | -4.930506 |
| H         | 0.811872  | 2.828220  | -3.281613 |
| H         | -0.123594 | -1.281796 | -4.171685 |
| H         | -0.528111 | -1.715003 | -1.785334 |
| H         | 0.432272  | 2.414100  |           |
| -0.891543 | H         | -1.570280 |           |
| 1.732320  | 0.562329  |           |           |
| H         | 1.527603  | -4.335201 | 1.532235  |
| H         | -0.429512 | -3.641881 | 3.154298  |
| H         | -1.409703 | -1.307873 | 2.533478  |
| H         | -0.335605 | 0.555937  | 3.207302  |
| H         | -1.637338 | 1.827873  | 3.026738  |
| C         | 0.178403  | 2.155500  | 1.812000  |
| Cl        | 1.900394  | 1.761618  | 1.905224  |
| Cl        | -0.127541 | 3.881278  | 1.598655  |

---

Temperature Corrections for 298.15 K

|                                              |                             |
|----------------------------------------------|-----------------------------|
| Zero-Point Energy=                           | 0.199341 (Hartree/Particle) |
| Thermal correction to Energy=                | 0.213513                    |
| Thermal correction to Enthalpies=            | 0.204719                    |
| Thermal correction to Gibbs Free Energies=   | 0.152477                    |
| Sum of electronic and thermal Energies=      | -1858.390576                |
| Sum of electronic and thermal Enthalpies=    | -1858.177062                |
| Sum of electronic and thermal Free Energies= | -1858.238100                |
| LUMO=                                        | -7.45(eV)                   |
| HOMO=                                        | -10.74(eV)                  |
